# Supplementary material
Source: PubMed Central journal article supplement (PMC1544056)
Supplement: pnas_0604078103_1.pdf [file pnas_0604078103_1.pdf]

**050211-2**

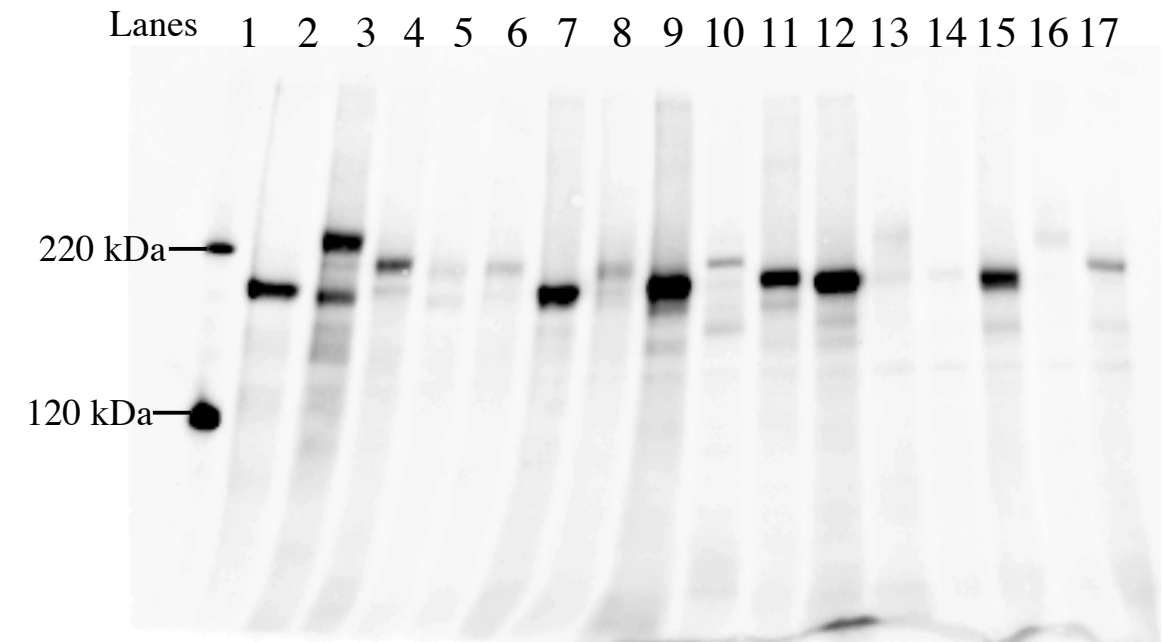

- 1 MW
- 2 Standard
- 3 YPR124W(2)
- 4 YKL219W
- 5 YJL059W(2)
- 6 YJL134W
- 7 YHL003C
- 8 YDL128W
- 9 YMR253C
- 10 YNL323W
- 11 YKR051W
- 12 YKL008C
- 13 YLR130C(2)
- 14 YMR187C
- 15 YMR034C
- 16 YOR301W
- 17 YDL133W

**050211-3**

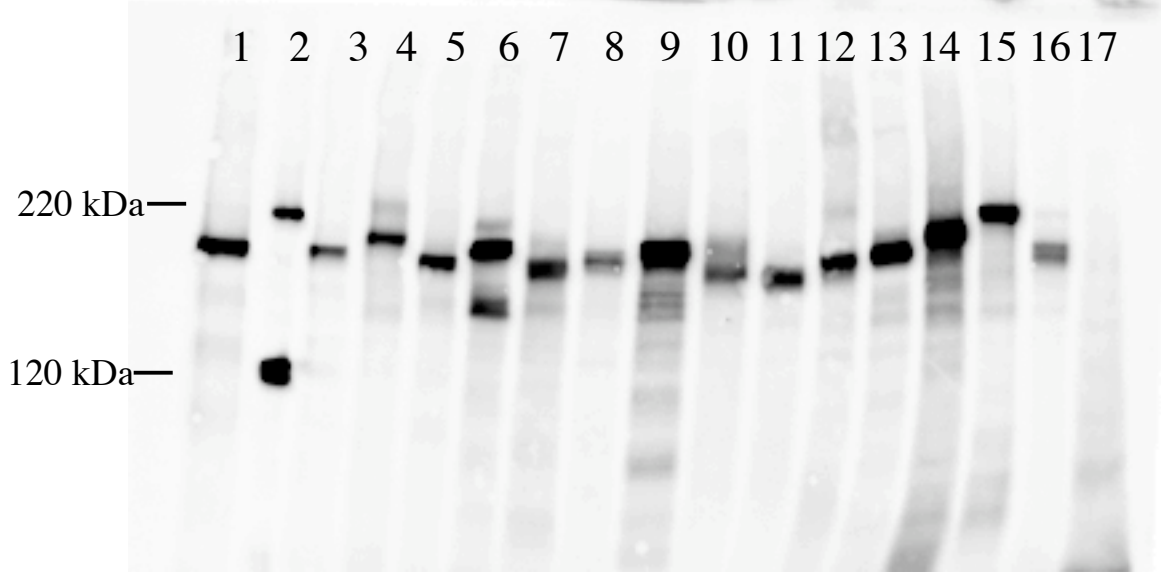

- 1 Standard
- 2 MW
- 3 YNL280C
- 4 YMR243C
- 5 YML038C
- 6 YLR080W
- 7 YJR124C
- 8 YOR307C
- 9 YJR117W
- 10 YIL170W(2)
- 11 YPL092W
- 12 YNL237W
- 13 YGR004W
- 14 YKL178C
- 15 YHR036W
- 16 YDR105C
- 17 YKL221W

- 1 Standard
- 2 YGL012W
- 3 YER019W
- 4 YLR378C
- 5 YEL064C
- 6 YDL089W
- 7 YGL104C
- 8 YDL054C
- 9 YPR138C
- 10 YIL088C
- 11 YIL090W
- 12 YGR175C
- 13 YJR054W
- 14 YOL137W
- 15 YJL091C
- 16 YNL142W
- 17 MW

Lanes 1 2 3 4 5 6 7 8 9 10 11 12 13 14 15 16 17

**050211-4**

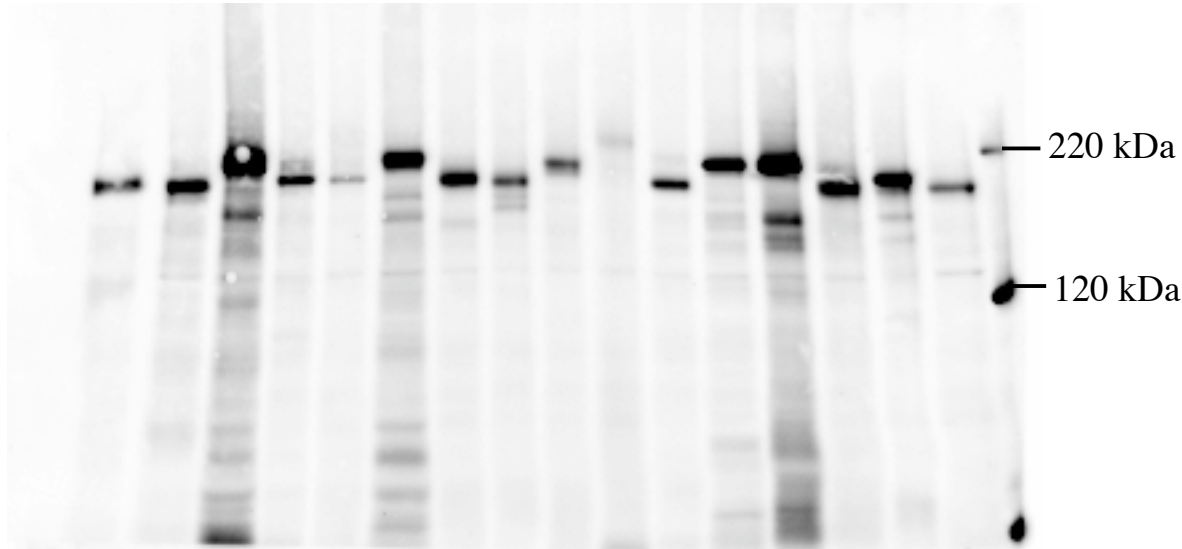

- 1 MW
- 2 Standard
- 3 YJL108C
- 4 YJR161C
- 5 YMR272C
- 6 YCR094W
- 7 YDL204W
- 8 YML018C(3)
- 9 YNR048W
- 10 YLR459W
- 11 YDR018C
- 12 YKL004W
- 13 YJL193W
- 14 YER145C(2)
- 15 YKR053C
- 16 YPR201W
- 17 YMR010W
- 18 YPR124W(2)

Lanes 1 2 3 4 5 6 7 8 9 10 11 12 13 14 15 16 17 18

**050211-1**

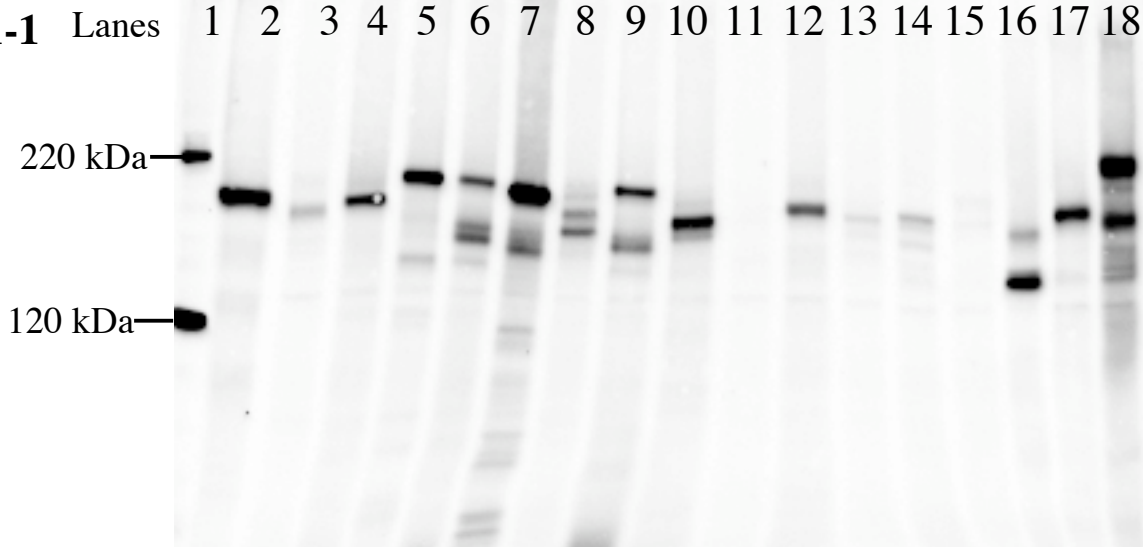

- 1 Standard
- 2 MW
- 3 YCR061W
- 4 YIR028W(2)
- 5 YNL095C(2)
- 6 YOL060C
- 7 YOR381W
- 8 YGL114W(2)
- 9 YKR067W
- 10 YPR003C
- 11 YJR040W(2)
- 12 YGL139W
- 13 YLL005C
- 14 YJL198W
- 15 YDL194W(2)
- 16 YMR054W(2)
- 17 YLR092W(2)

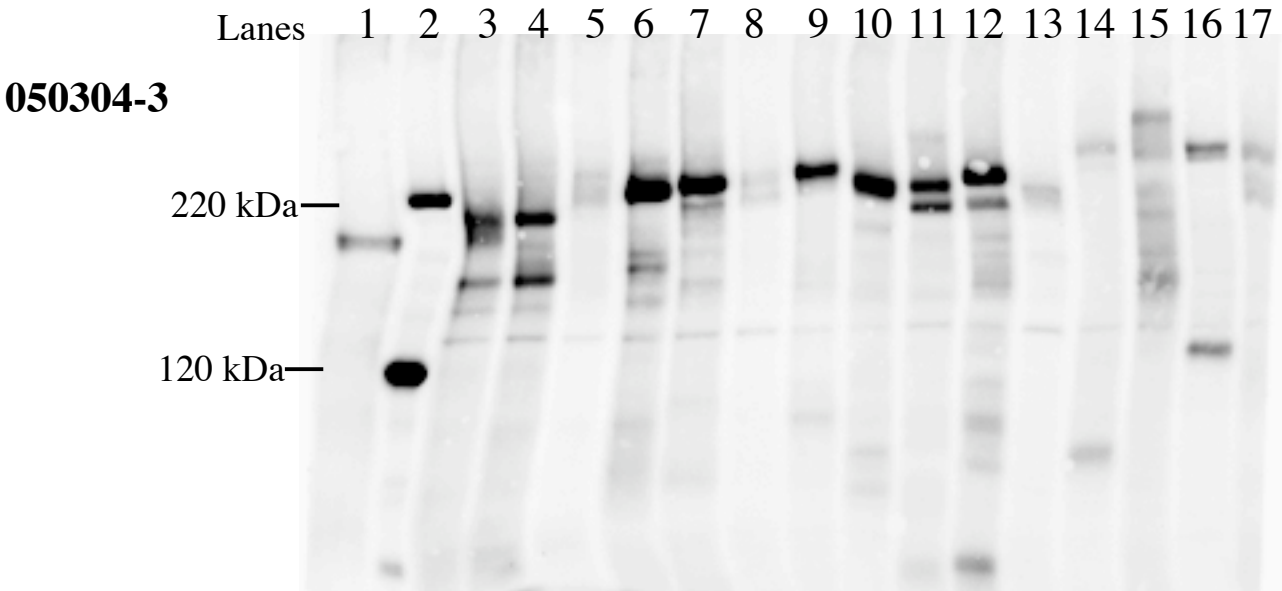

- 1 Standard
- 2 YBR064W
- 3 YCL058C
- 4 YBR147W
- 5 YCR034W
- 6 YBR302C
- 7 YAL023C
- 8 YFL067W
- 9 YHR175W
- 10 YGL247W
- 11 YFR042W
- 12 YNL038W
- 13 YGR172C
- 14 YKR030W
- 15
- 16 YGL161C(2)
- 17 YDR492W

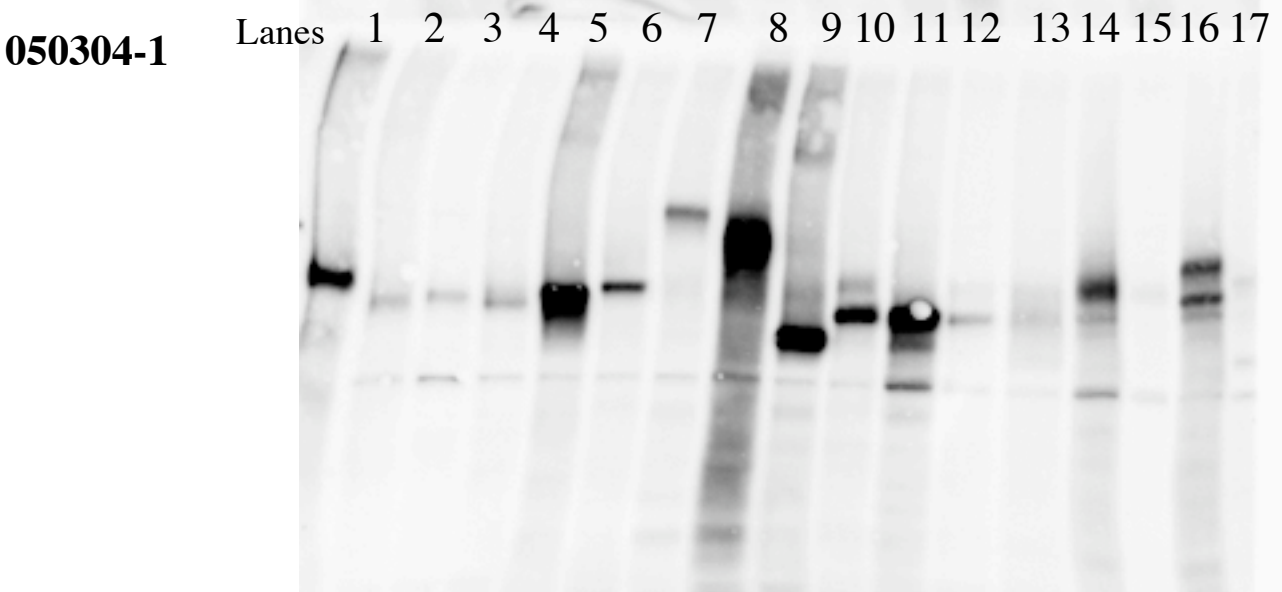

Lanes 1 2 3 4 5 6 7 8 9

**050304-4**

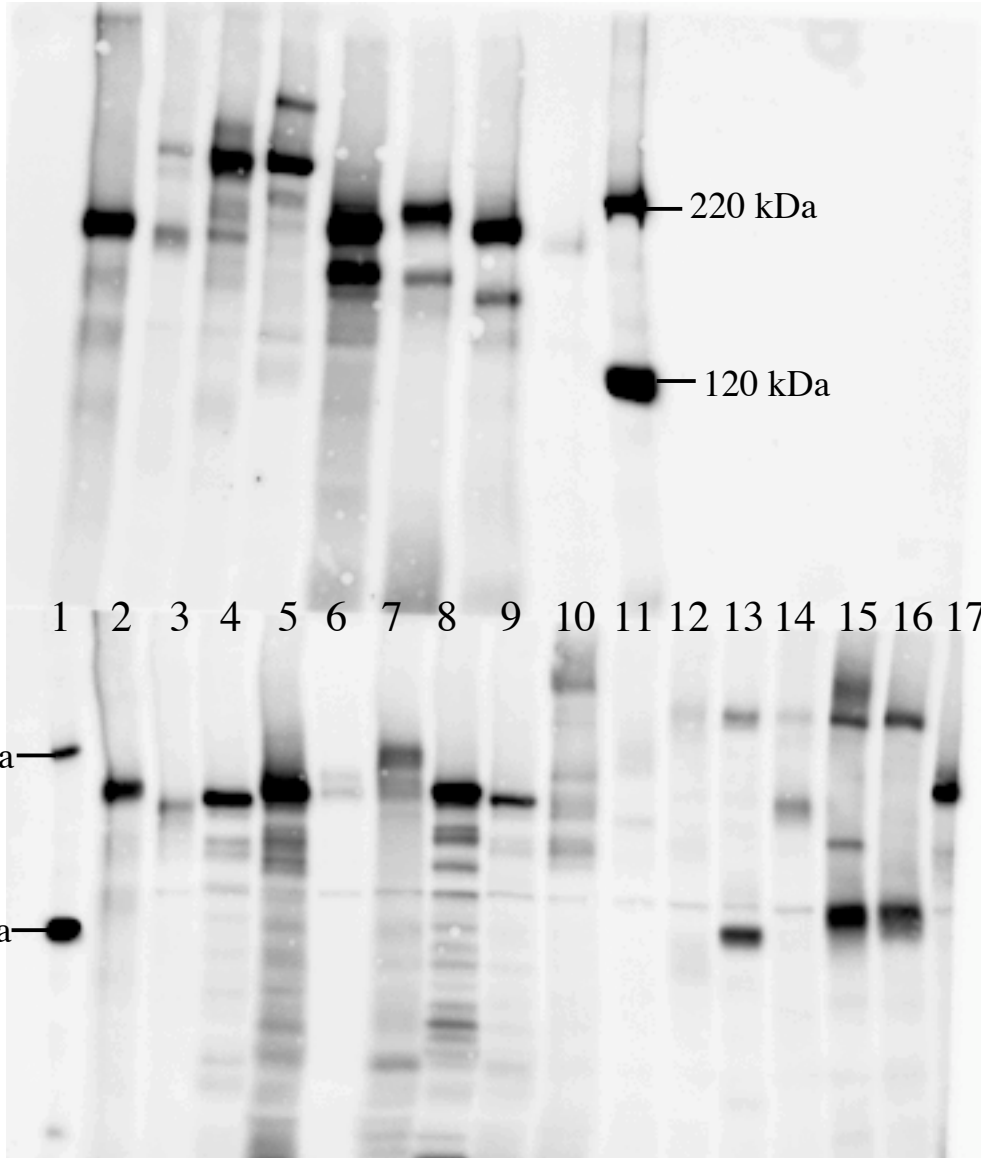

- 1 Standard
- 2 YNR013C(2)
- 3 YKL165C
- 4 YGR089W
- 5 YNL268W(2)
- 6 YOL103W
- 7 YGR224W
- 8 YML047C
- 9 MW

Lanes 1 2 3 4 5 6 7 8 9 10 11 12 13 14 15 16 17

220 kDa

120 kDa

**050304-2**

- 1 MW
- 2 Standard
- 3 YHR142W
- 4 YOL073C
- 5 YKL051W
- 6 YER118C(2)
- 7 YGL255W
- 8 YHL048W
- 9 YDL248W
- 10 YOL105C(#)
- 11 YOR348C(#)
- 12 YKR050W
- 13 YMR054W
- 14 YNR013C(2)
- 15 YPL036W(#)
- 16 YDR040C(2)
- 17 YHL040C

Lanes 1 2 3 4 5 6 7 8 9 10 11 12 13 14 15

- 1 Standard
- 2 MW
- 3 YJR152W
- 4 YDL035C(3)
- 5 YKL064W
- 6 YKL015W
- 7 YLR138W
- 8 YOL084W
- 9 YDL149W(2)
- 10 YDR270W
- 11 YFL025C(2)
- 12 YGR125W
- 13 YLR450W
- 14 YML075C
- 15 YFL034W

**050204-3**

220 kDa —

120 kDa —

60 kDa —

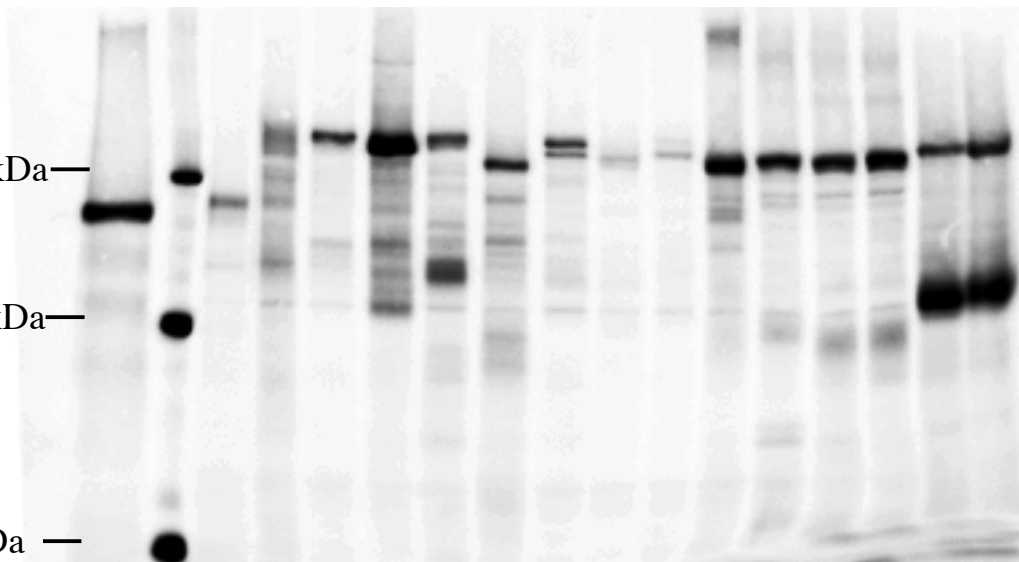

Lanes 1 2 3 4 5 6 7 8 9 10 11 12 13 14 15 16 17 18

- 1 MW
- 2 Standard
- 3 YHR096C
- 4 YLR237W
- 5 YOR071C
- 6 YOR192C
- 7 YKR093W
- 8 YJR001W(2)
- 9 YKR039W
- 10 YJR160C
- 11 YGR191W
- 12 YLR353W(3)
- 13 YDR046C
- 14 YOL158C
- 15 YPL265W
- 16 YPL189W
- 17 YDL247W
- 18 YGR216C

220 kDa —

120 kDa —

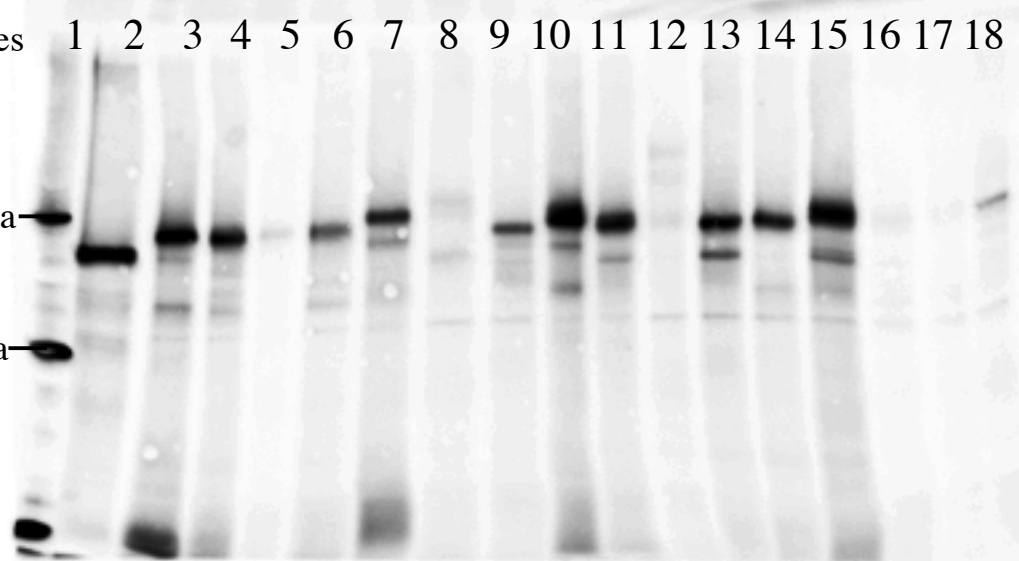

**050204-1**

Lanes 1 2 3 4 5 6 7 8 9 10 11 12 13 14 15 16 17

**050204-4**

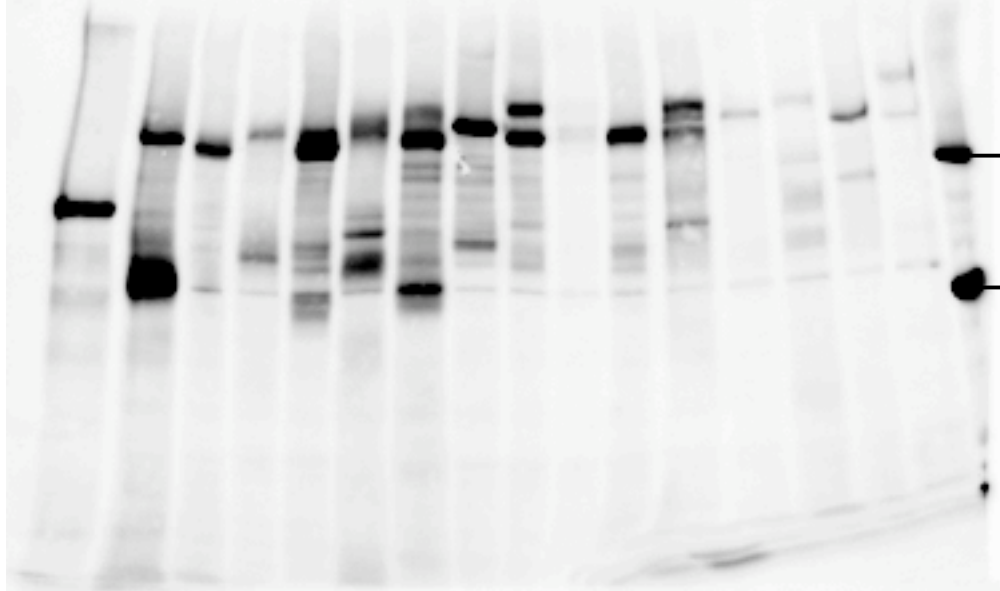

- 1 Standard
- 2 YDR039C
- 3 YDL231C
- 4 YNL192W
- 5 YIL048W
- 6 YPL006W
- 7 YGL006W
- 8 YOR086C
- 9 YEL031W(2)
- 10 YKR103W
- 11 YGL140C
- 12 YIL147C(2)
- 13 YNL257C
- 14 YJL129C
- 15 YKL209C
- 16 YOL075C(2)
- 17 MW

Lanes 1 2 3 4 5 6 7 8 9 10 11 12 13 14 15

220 kDa—

120 kDa—

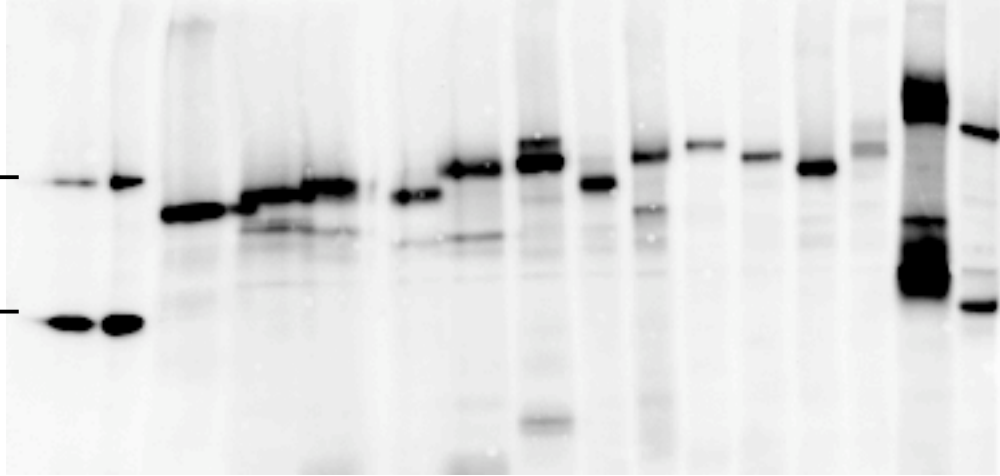

**050204-2**

- 1 MW
- 2 Standard
- 3 YNL268W
- 4 YOL103W
- 5 YOR092W
- 6 YGR138C
- 7 YLR088W
- 8 YKR106W
- 9 YKL217W
- 10 YGL142C
- 11 YKL174C
- 12 YOR175C
- 13 YOR030W
- 14 YPL036W
- 15 YGL167C

**041229-2**

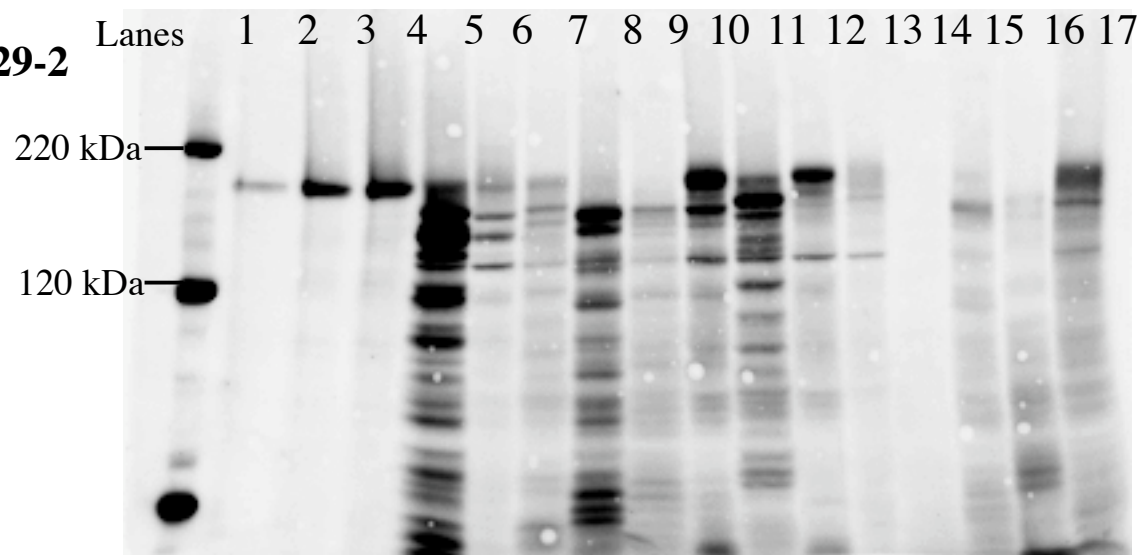

- 1 MW
- 2 Standard
- 3 YIL040W(#)
- 4 YGL054C(#)
- 5 YDR437W(#)
- 6 YDL123W
- 7 YJR044C
- 8 YIL027C
- 9 YDR100W
- 10 YER044C
- 11 YLL052C
- 12
- 13 YLL053C
- 14 YOR044W
- 15 YDL172C(2)

**041229-4**

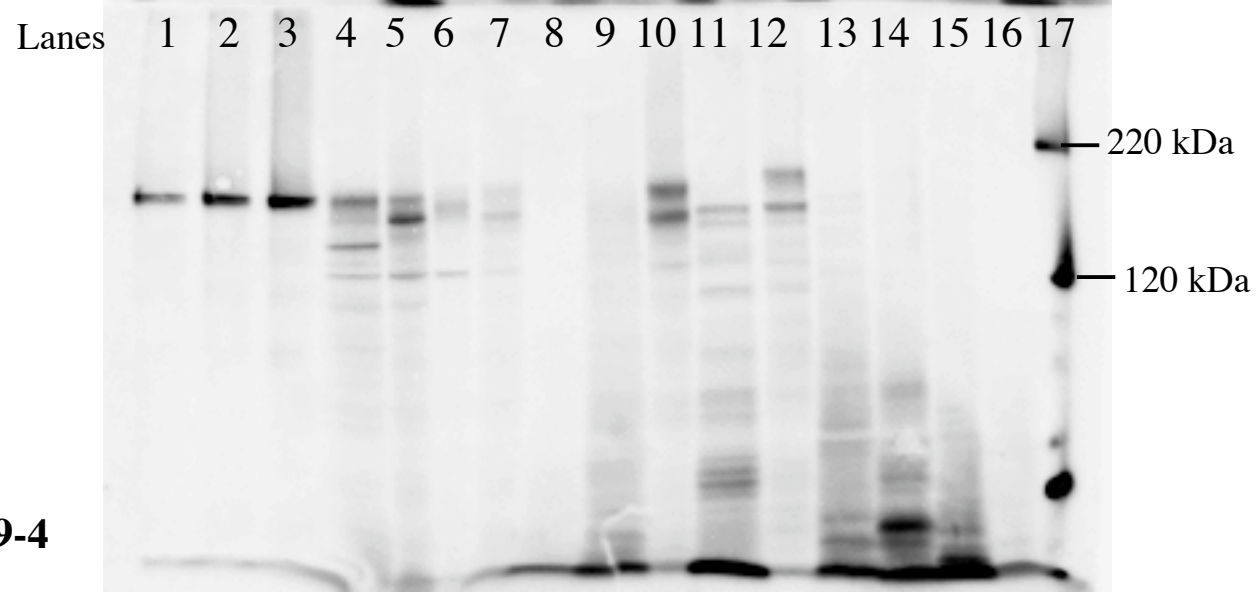

- 1 Standard
- 2 YNL109W
- 3 YOL129W(2)
- 4 YOR331C
- 5 YGL231C(2)
- 6
- 7 YPL257W
- 8 YMR118C(2)
- 9 YNL158W(2)
- 10 YDR084C(2)
- 11 YJL004C(2)
- 12
- 13
- 14
- 15 MW

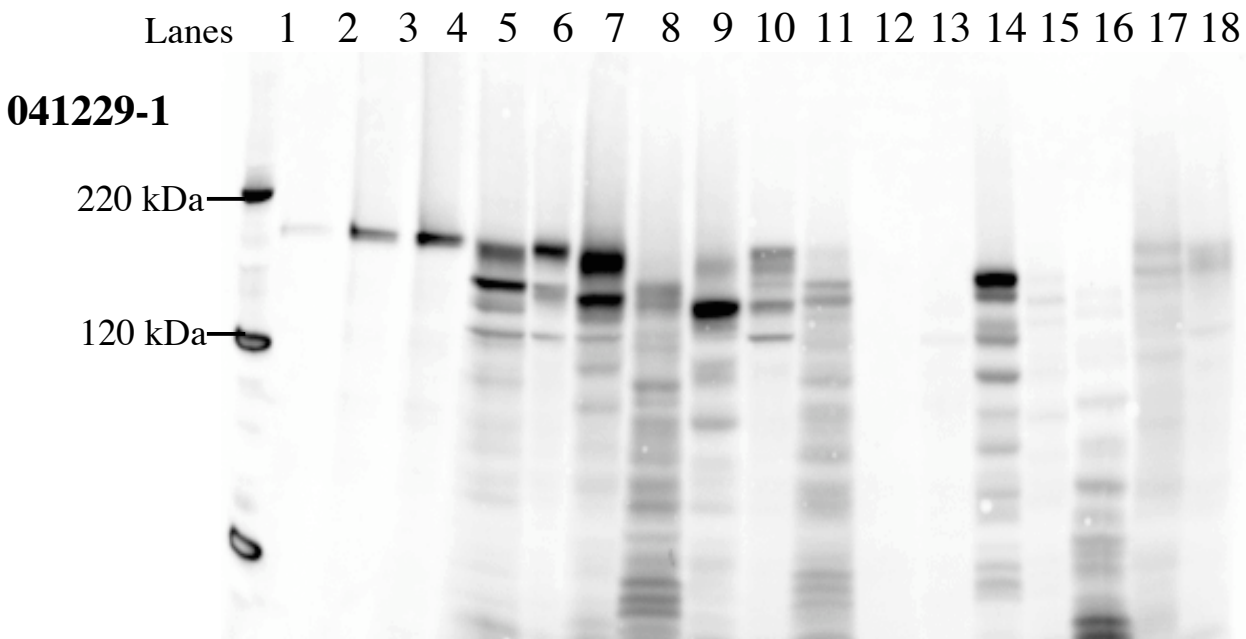

- 1 MW
- 2
- 3
- 4 Standard
- 5 YNL146W(2)
- 6 YJR085C
- 7 YIL054W(2)
- 8 YOL048C
- 9 YMR158W-B
- 10 YLL014W
- 11 YPL098C(2)
- 12
- 13 YML047W-A
- 14 YMR123W
- 15 YML057C-A
- 16 YNL143C(2)
- 17 YJL151C(2)
- 18 YOR103C

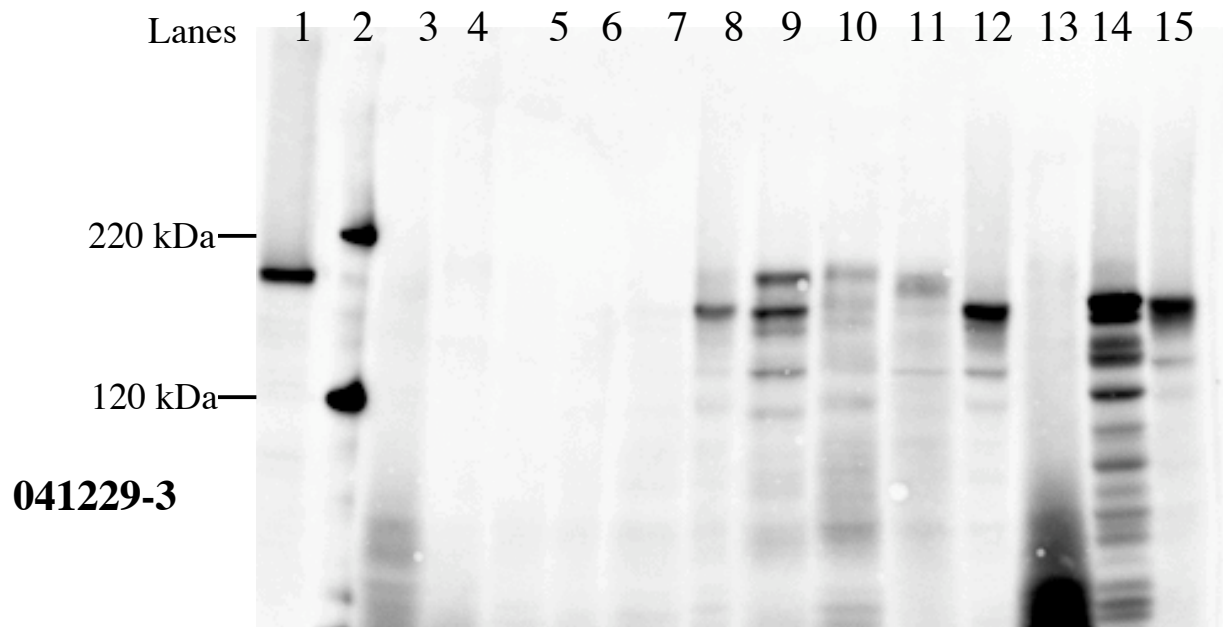

- 1 Standard
- 2 MW
- 3 YEL027W
- 4 YFL051C
- 5
- 6
- 7 YPL234C(2)
- 8 YMR071C
- 9 YOL163W(2)
- 10 YHL043W
- 11 YJL175W
- 12 YGL010W
- 13
- 14 YML055W
- 15 YLR065C



Lanes 1 2 3 4 5 6 7 8 9 10 11 12 13 14 15 16 17

**041231-4**

220 kDa

120 kDa

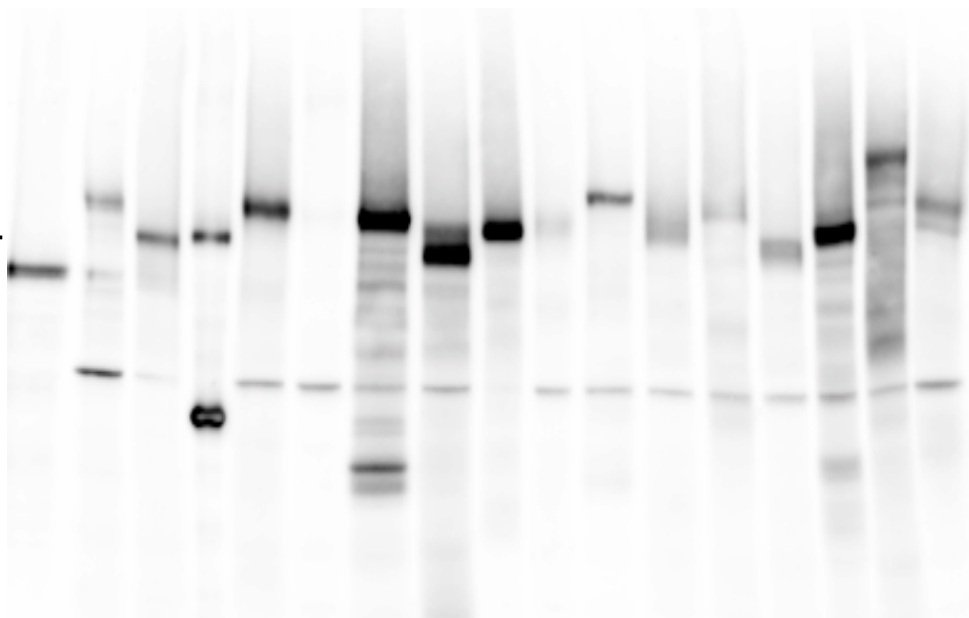

- 1 Standard
- 2 YLR413W
- 3 YOR365C
- 4 MW
- 5 YDL093W
- 6 YKL034W
- 7 YOR165W
- 8 YPL221W
- 9 YER184C
- 10 YJL212C
- 11 YPL019C
- 12 YPL019C
- 13 YPL019C
- 14 YPL019C
- 15 YPL019C
- 16 YDL194W
- 17 YKR050W

Lanes 1 2 3 4 5 6 7 8 9 10 11 12 13 14 15 16 17 18

220 kDa

120 kDa

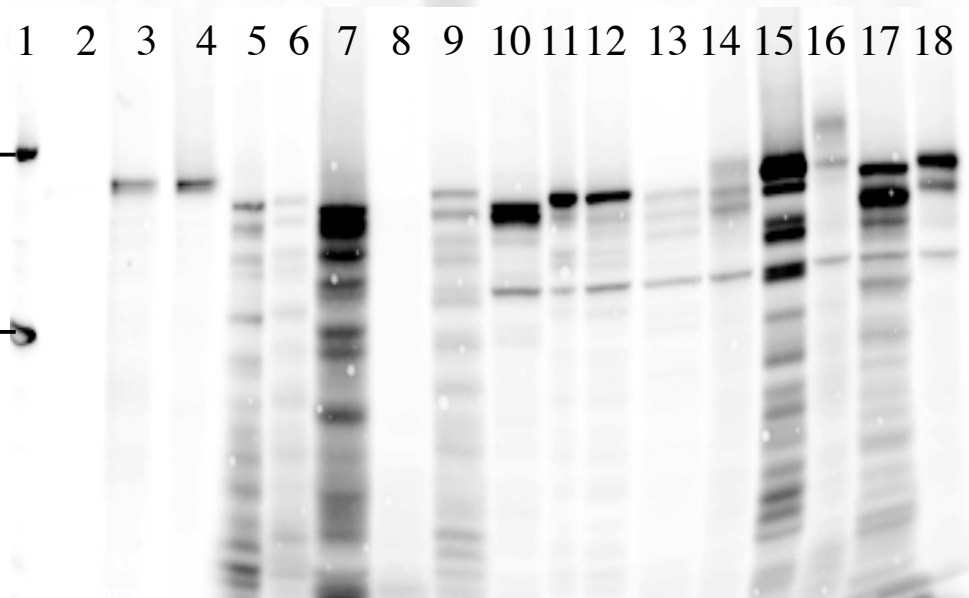

- 1 MW
- 2
- 3
- 4 Standard
- 5 YDL072C
- 6 YIL089W(2)
- 7 YKL065C
- 8
- 9 YHR110W(2)
- 10 YOL162W
- 11 YLR350W
- 12 YGL002W
- 13 YJL097W(3)
- 14 YDR302W(3)
- 15 YNR061C(2)
- 16 YJL038C(2)
- 17 YPR113W(2)
- 18 YGR038W(2)

**041231-1**

**041231-2**

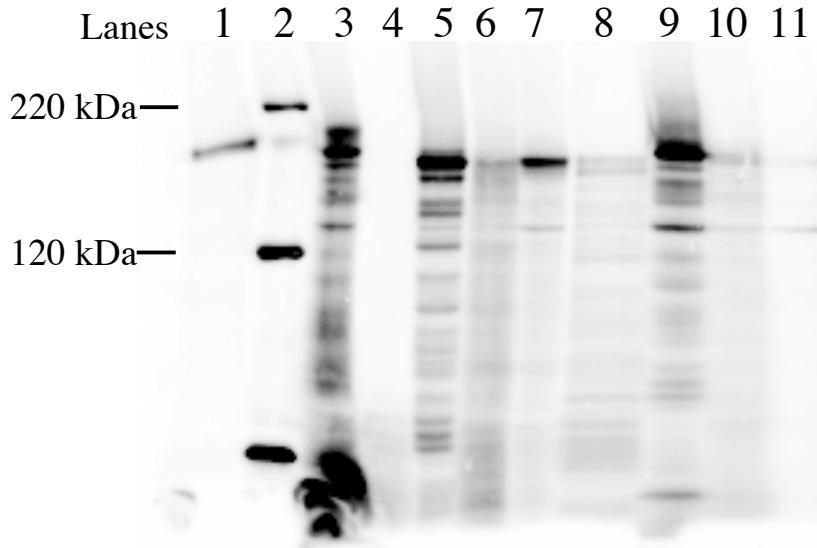

- 1 Standard
- 2 MW
- 3 YGL051W(2)
- 4
- 5 YGL053W
- 6 YMR063W
- 7 YDR410C
- 8 YGR036C(2)
- 9 YLR326W
- 10 YLR411W
- 11 YER039C

**041231-3**

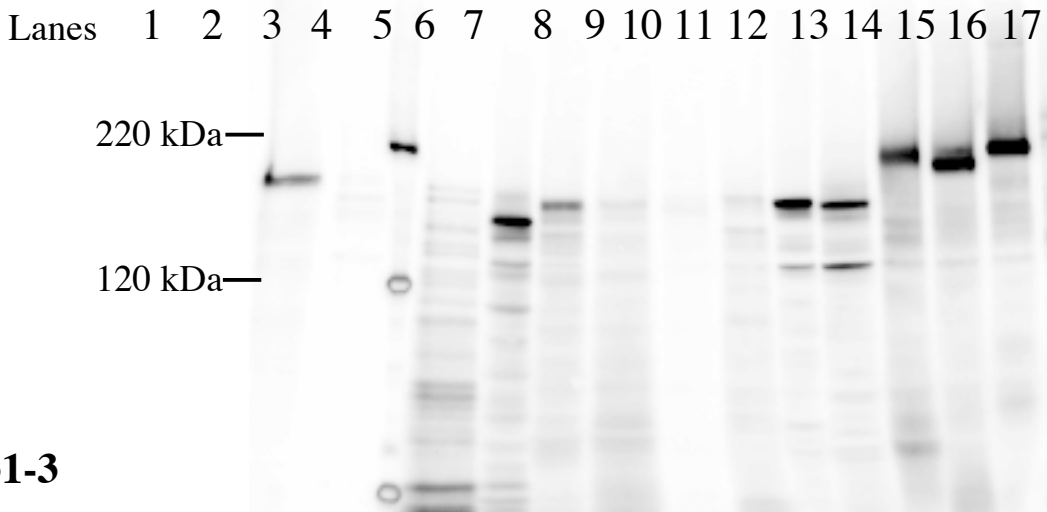

- 1 Standard
- 2 YIL049W
- 3 MW
- 4 YOR152C(2)
- 5 YNL228W
- 6 YPL246C
- 7 YLR414C
- 8 YHL026C
- 9 YPL162C
- 10 YLR064W
- 11 YDR503C
- 12 YPR156C
- 13 YHL040C
- 14 YHL008C
- 15 YIL037C(2)
- 16 YOR254C
- 17 YLL043W

**050107-4**

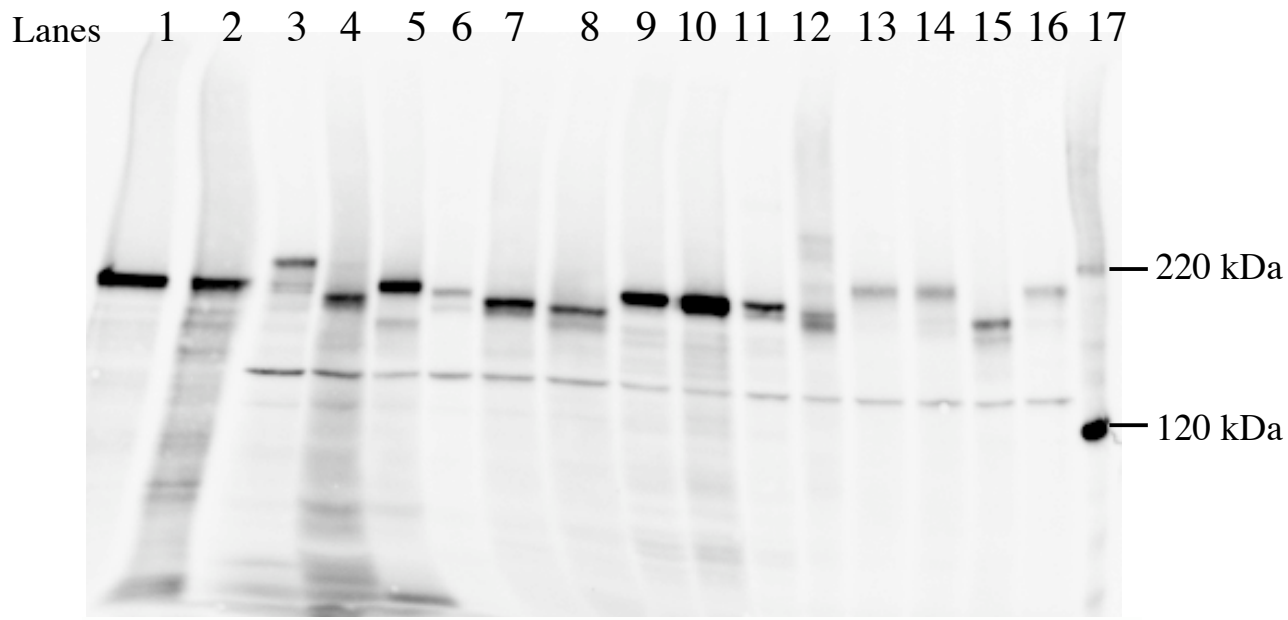

- 1 Standard
- 2
- 3 YER083C
- 4 YOL092W
- 5 YOR292C
- 6 YDL015C
- 7 YJL196C
- 8 YGR284C
- 9 YJL117W
- 10 YML125C
- 11 YML087C
- 12 YNL322C(2)
- 13 YOR079C
- 14 YNL263C
- 15 YPR114W
- 16 YMR274C
- 17 MW

**050107-3**

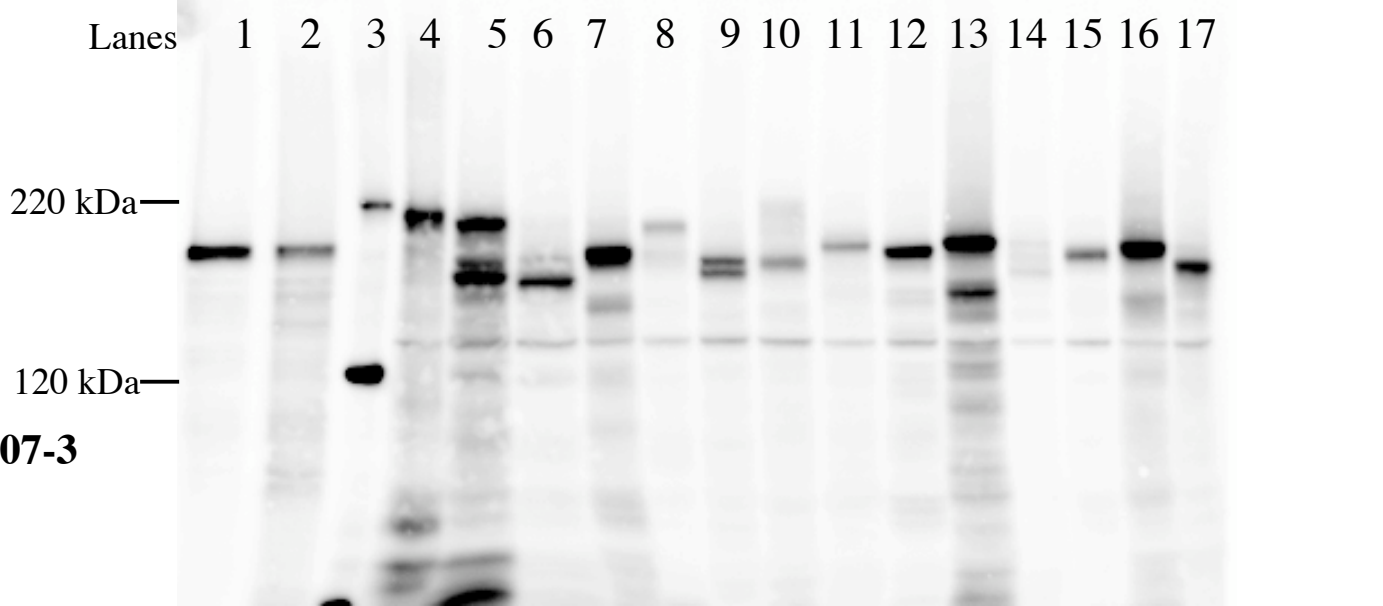

- 1 Standard
- 2
- 3 MW
- 4 YNL019C
- 5 YMR149W(2)
- 6 YNL159C
- 7 YDR284C
- 8 YOR311C
- 9 YHR133C(2)
- 10 YOR223W
- 11 YPR109W
- 12 YFR041C
- 13 YDR233C
- 14 YNL305C(3)
- 15 YNL156C
- 16 YML052W
- 17 YJR013W

**050107-1**

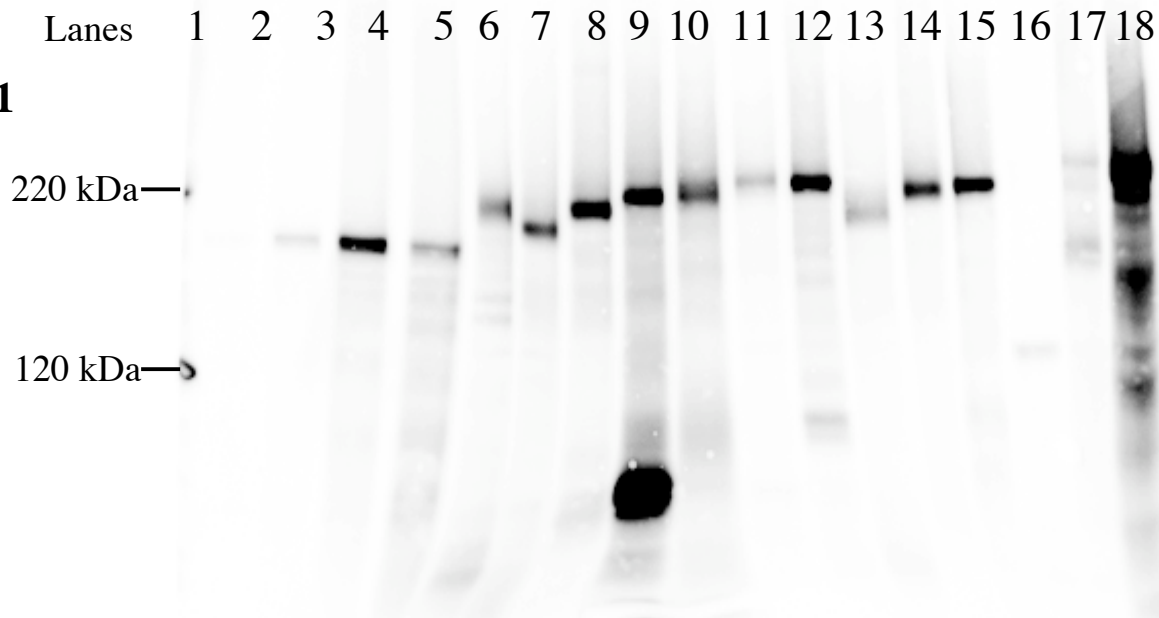

- 1 MW
- 2
- 3 Standard
- 4
- 5 YPR156C\*
- 6 YHL040C\*
- 7 YHL008C\*
- 8 YOR254C\*
- 9 YLL043W\*
- 10 YDL093W\*
- 11 YOR165W\*
- 12 YPL221W\*
- 13 YER184C\*
- 14 YGR157W\*
- 15
- 16 YNR013C
- 17 YIL047C

**050107-2**

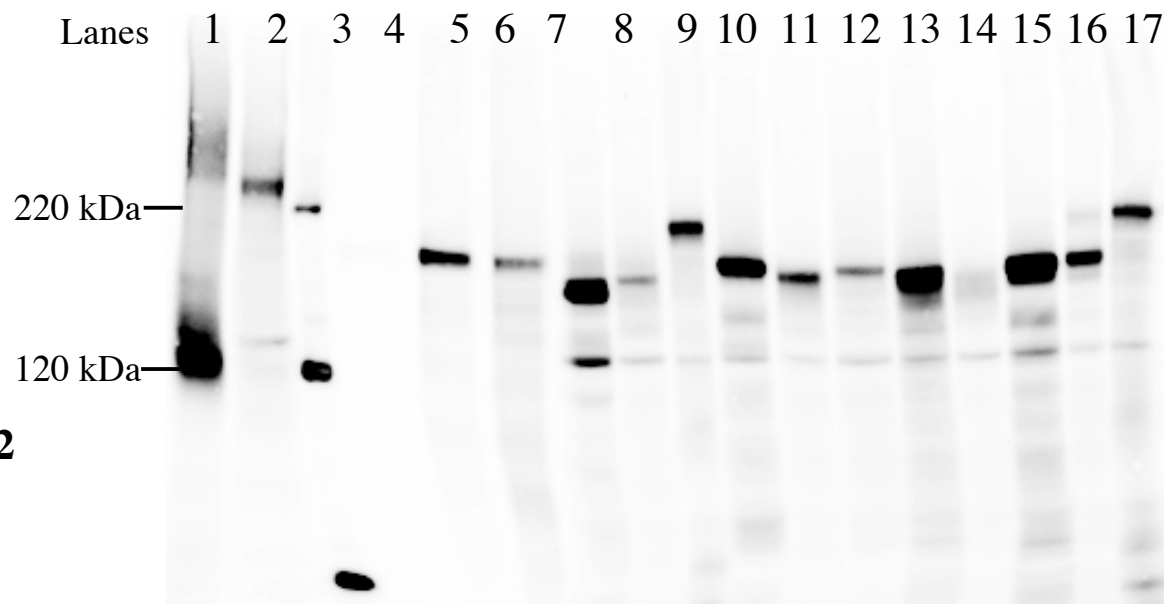

- 1 YGL008C
- 2 YKL165C
- 3 MW
- 4
- 5 Standard
- 6
- 7 YDR319C
- 8 YDR384C
- 9 YPR027C
- 10 YHR192W
- 11 YGR026W
- 12 YJR116W
- 13 YLL023C
- 14 YPL076W
- 15 YPL094C
- 16 YNL320W
- 17 YNL033W

Lanes 1 2 3 4 5 6 7 8 9 10 11 12 13 14 15 16 17

**050111-3**

220 kDa—

120 kDa—

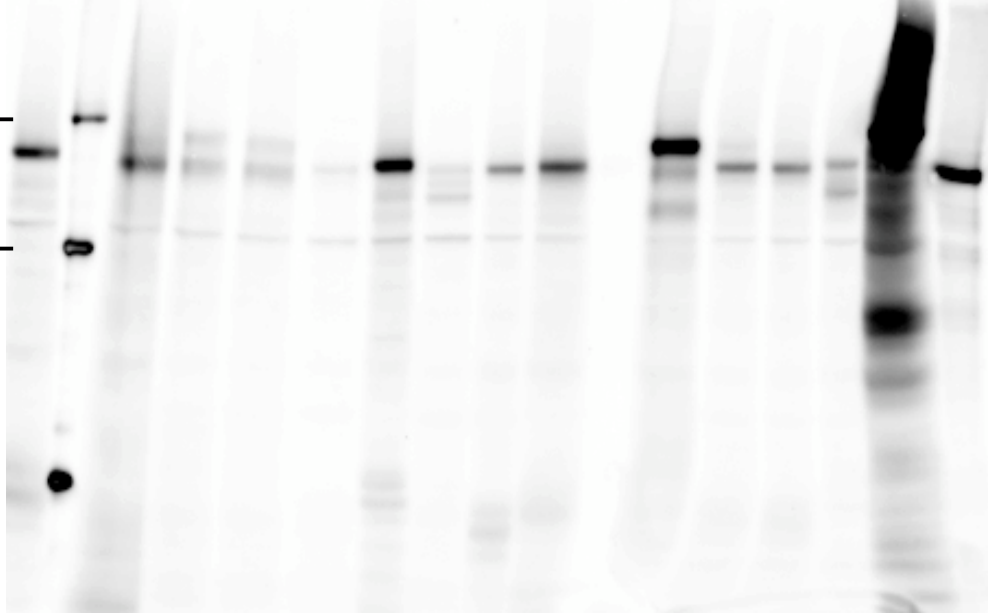

- 1 YNR075W
- 2 MW
- 3 YDR459C
- 4 YOR390W(2)
- 5 YPL279C(2)
- 6 YGR168C
- 7 YOL003C
- 8 YFL062W(3)
- 9 YML132W
- 10 YGL126W
- 11
- 12 YPR079W
- 13 YGR295C
- 14 YNL336W
- 15 YPL057C(2)
- 16 Standard

Lanes 1 2 3 4 5 6 7 8 9 10 11 12 13 14 15 16 17 18

220 kDa—

120 kDa—

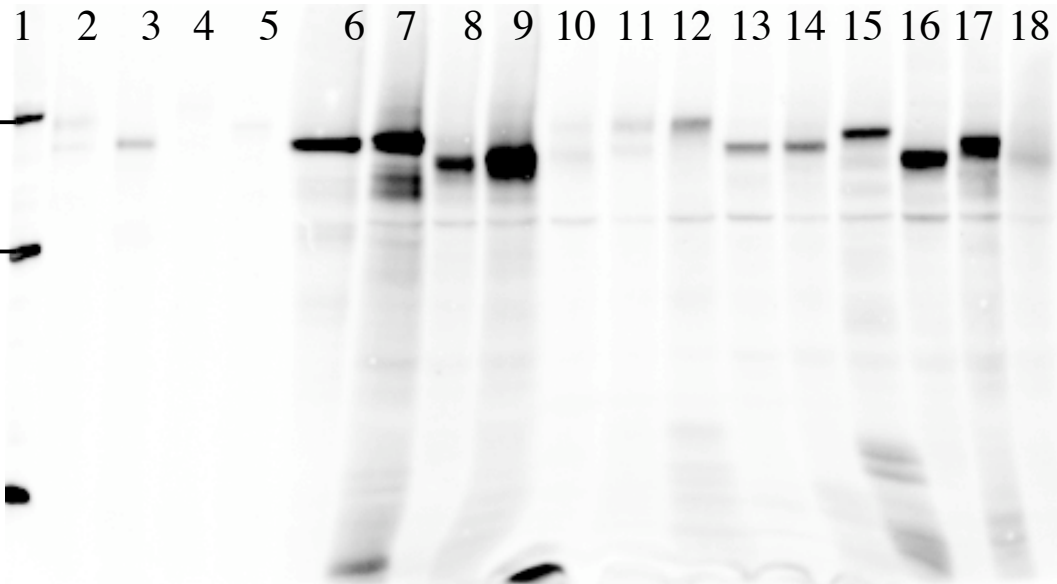

- 1 MW
- 2
- 3
- 4
- 5
- 6 Standard
- 7 YDL218W
- 8 YPL087W
- 9 YDR033W
- 10 YLR242C(2)
- 11 YLR220W(2)
- 12 YML019W
- 13 YDR126W
- 14 YNL326C
- 15 YEL017W
- 16 YGL225W
- 17 YKR088C
- 18 YPL244C

**050111-1**

**050111-2**

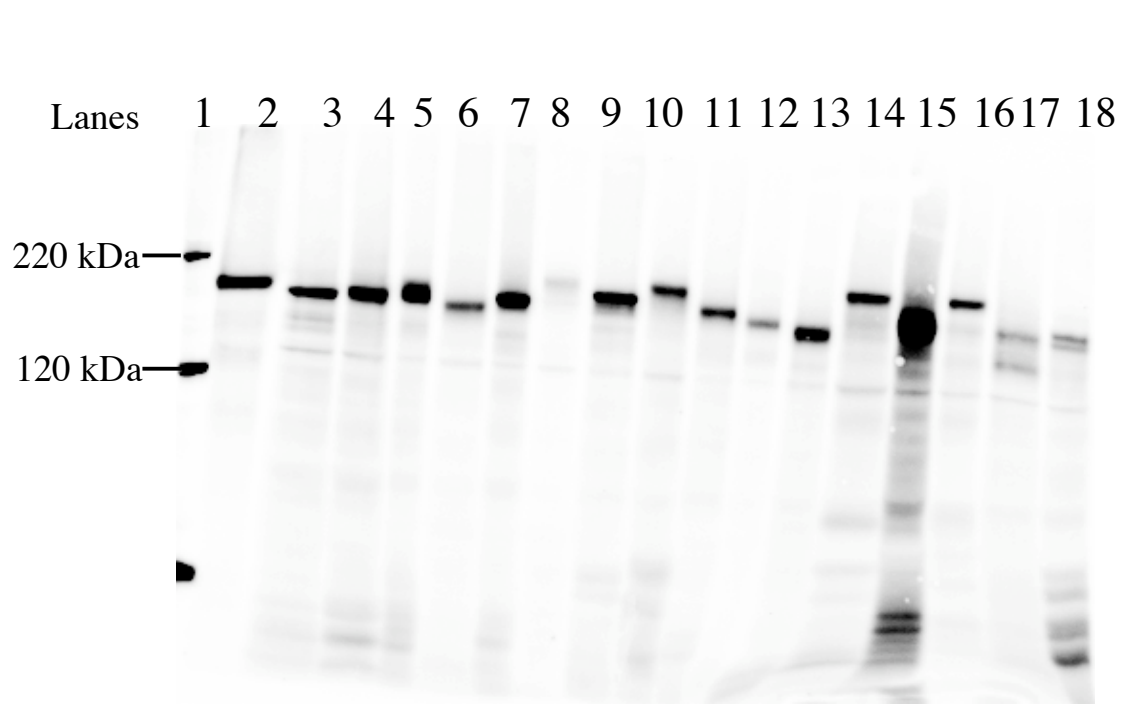

- 1 MW
- 2 Standard
- 3 YDR411C
- 4 YOL107W
- 5 YMR126C
- 6 YEL004W
- 7 YLR372W
- 8 YIL023C
- 9 YDR297W
- 10 YOR085W
- 11 YOR049C
- 12 YLR246W
- 13 YDR414C
- 14 YLR056W
- 15 YML131W
- 16 YNL080C
- 17 YML066C(2)
- 18 YIL006W(2)

**050128-4**

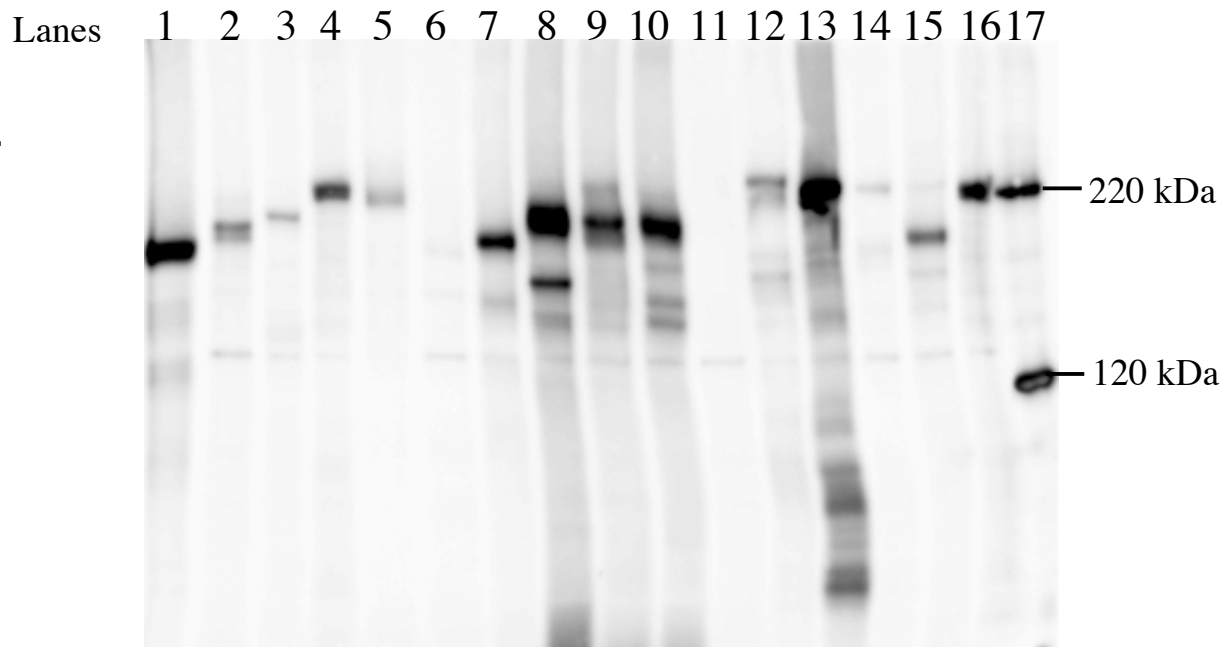

- 1 Standard
- 2 YGL186C
- 3 YHR194W
- 4 YHR150W
- 5 YHR032W
- 6 YKR105C(2)
- 7 YLL061W
- 8 YDR497C
- 9 YNR055C
- 10 YNL065W
- 11
- 12 YPL274W
- 13 YOR154W
- 14 YKL100C
- 15 YEL063C
- 16 YHR150W
- 17 MW

- 1 MW
- 2 Standard
- 3 YIL121W
- 4 YLR023C
- 5 YJR152W
- 6 YPR198W
- 7 YOR002W
- 8 YHL036W
- 9 YFL011W
- 10 YGR197C
- 11 YDL180W
- 12 YMR155W
- 13 YGR041W
- 14 YOL013C
- 15 YNR030W
- 16 YOL019W
- 17 YMR319C
- 18 YHR078W

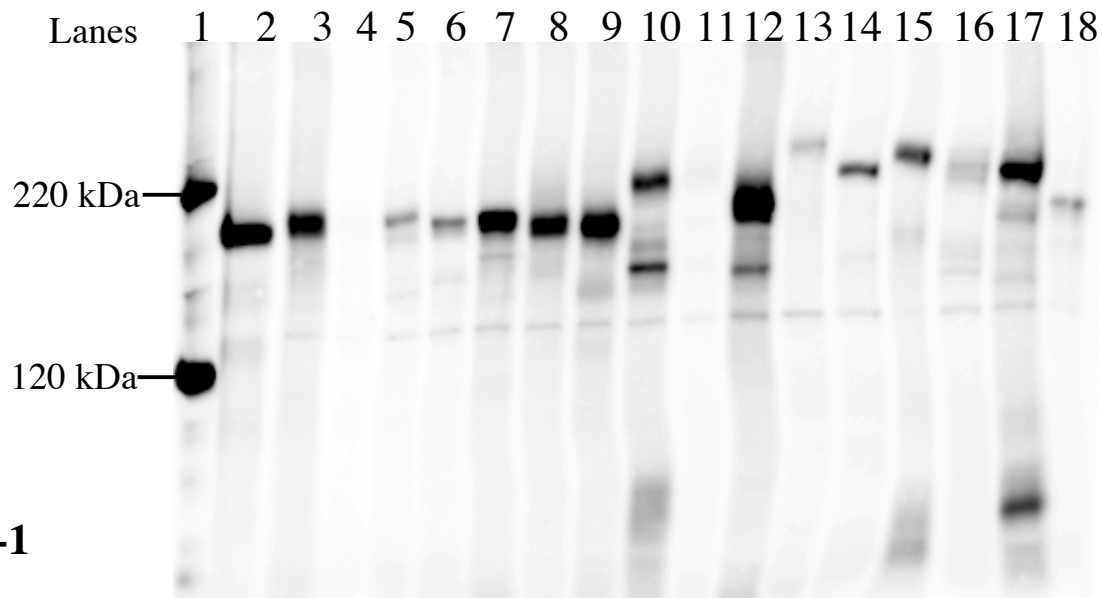

**050128-1**

- 1 Standard
- 2 MW
- 3 YDR479C
- 4 YJL163C
- 5 YDR387C
- 6 YNL219C
- 7 YER140W
- 8 YFL055W
- 9 YHR092C
- 10 YNR056C
- 11 YMR088C(3)
- 12 YIL120W
- 13 YGL077C
- 14 YEL069C(2)
- 15 YJL219W
- 16 YDL245C
- 17 YJR158W

Lanes 1 2 3 4 5 6 7 8 9 10 11 12 13 14 15 16 17

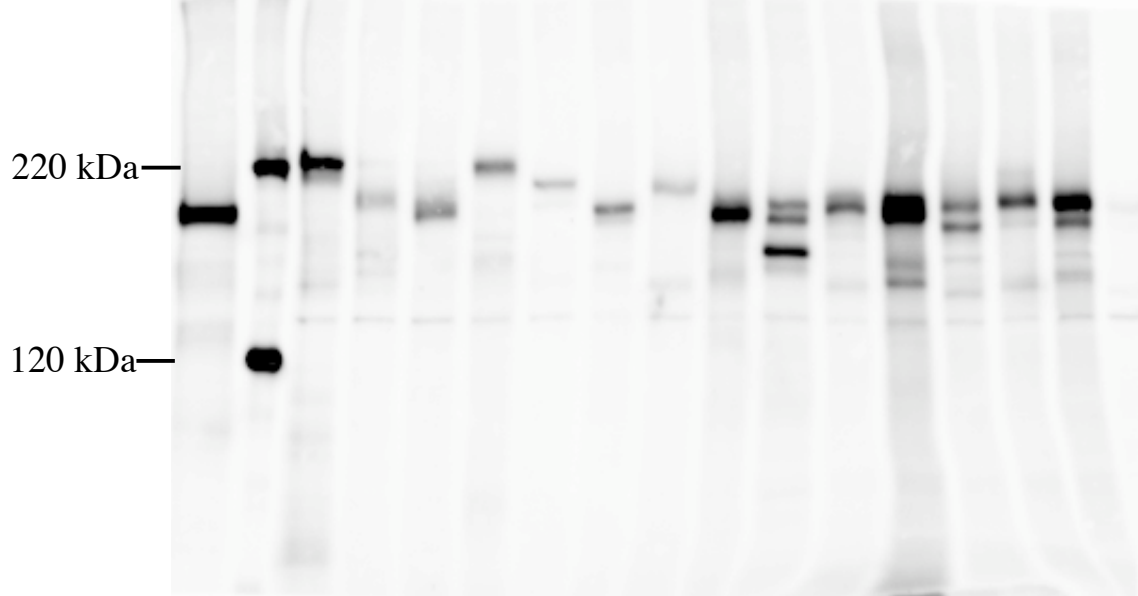

- 1 Standard
- 2 YOL156W
- 3 MW
- 4 YDR345C
- 5 YDR536W
- 6 YJL214W
- 7 YHR094C
- 8 YGL160W(2)
- 9 YDR343C
- 10 YDR342C
- 11 YDL210W
- 12 YNL270C
- 13 YLR081W(2)
- 14 YOL122C
- 15 YLR152C
- 16 YNL275W(2)
- 17 YOR067C

Lanes 1 2 3 4 5 6 7 8 9 10 11 12 13 14 15 16 17

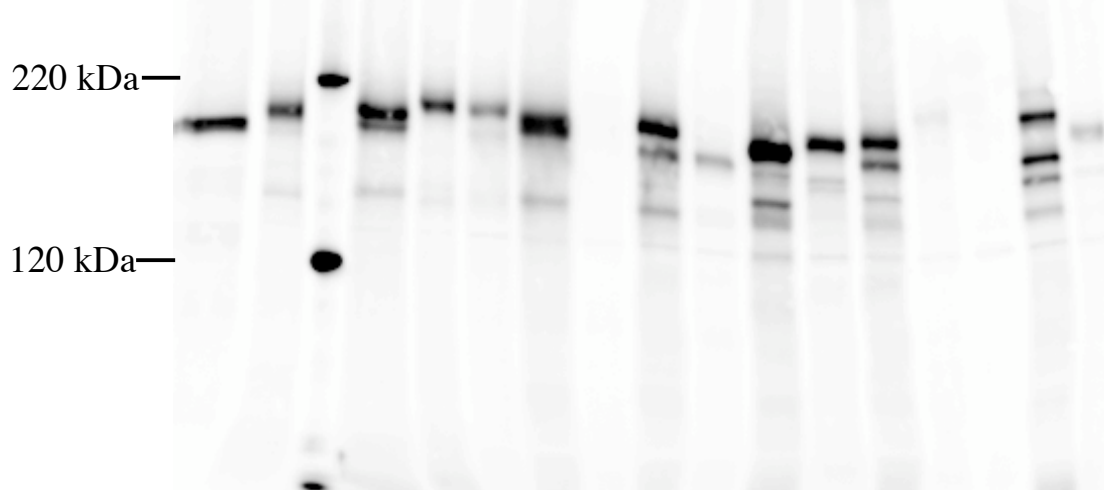



**050218-2**

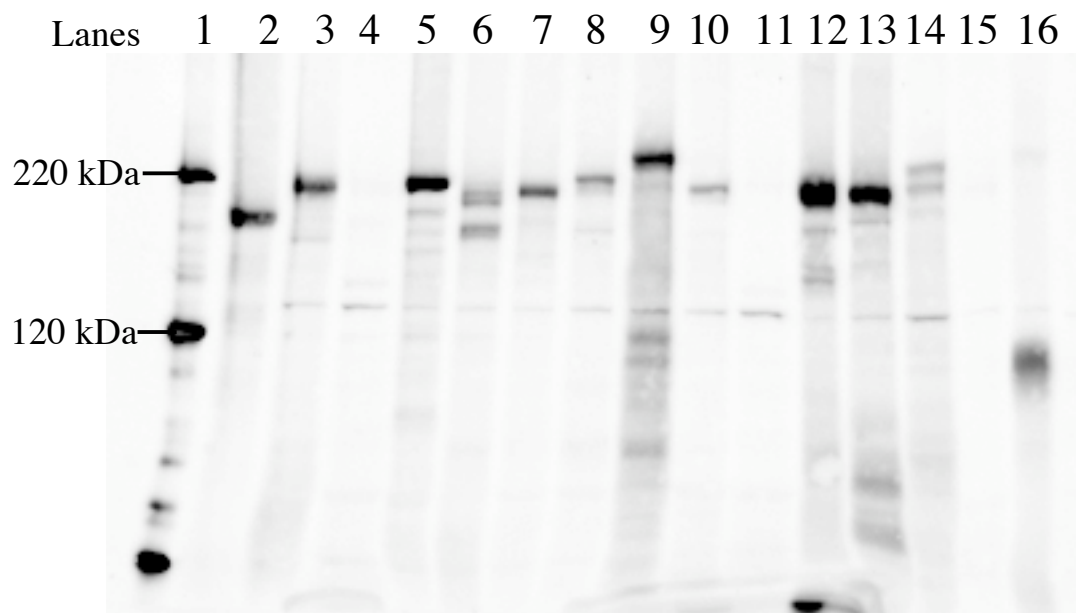

- 1 MW
- 2 Standard
- 3 YDR508C
- 4 YLR083C(2)
- 5 YNL008C
- 6 YDR107C(2)
- 7 YNL125C
- 8 YOR087W
- 9 YIL067C
- 10 YLR047C
- 11 YLR214W
- 12 YDL199C
- 13 YJL093C
- 14 YKL146W(2)
- 15 YOR384W
- 16 YDR338C

**050218-1**

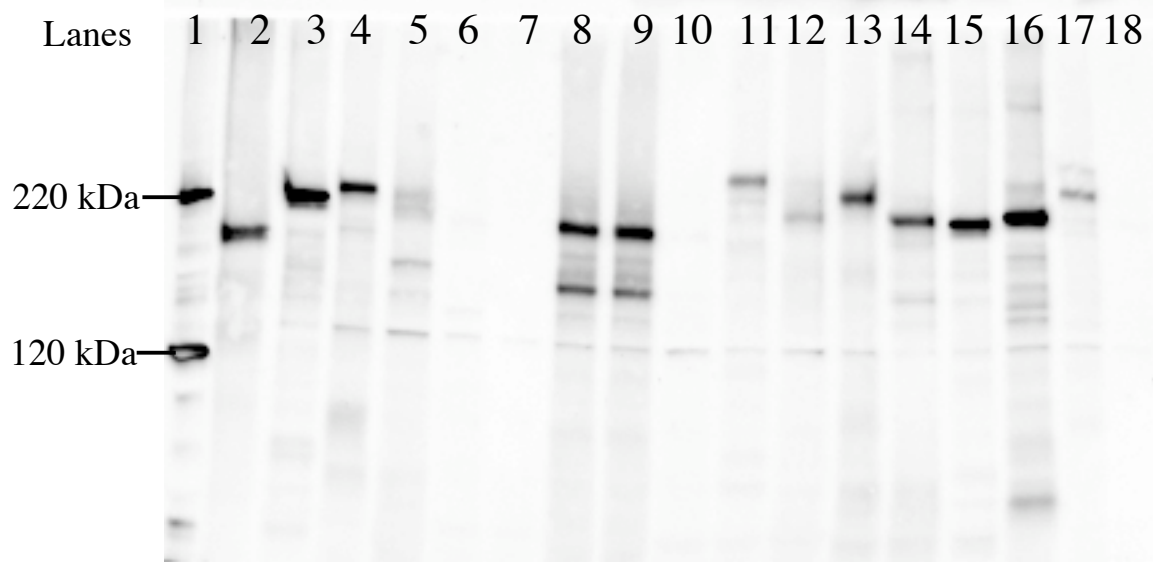

- 1 MW
- 2 Standard
- 3 YKL212W
- 4 YMR119W
- 5 YHL008C
- 6 YEL065W
- 7
- 8 YCR061W
- 9 YIR028W
- 10 YHL047C
- 11 YNR019W
- 12 YNL095C
- 13 YNL115C
- 14 YFL054C
- 15 YML031W
- 16 YOR273C
- 17 YNL279W
- 18 YDR307W

- 1 MW
- 2 Standard
- 3 MW
- 4 YJR143C
- 5 YDL138W
- 6 YDR264C
- 7 YDR119W
- 8 YJR040W(2)
- 9 YLR241W
- 10 YGL139W(2)
- 11 YDL095W
- 12 YJL051W(2)
- 13 YFL004W
- 14 YJL062W
- 15 YDR089W
- 16 YJL094C
- 17 YPR194C
- 18 YJL198W

- 1 YOR381W
- 2 YLL051C
- 3 YNL101W
- 4 YGL022W
- 5 YNR060W
- 6 YGL114W(2)
- 7 YJR106W
- 8 YHL016C
- 9 YDR205W
- 10 YKR067W
- 11 YOR034C
- 12 YKL187C(#)
- 13 YOR321W
- 14 YGR199W
- 15 YDL206W(2)
- 16 MW
- 17 Standard

**050218-4**

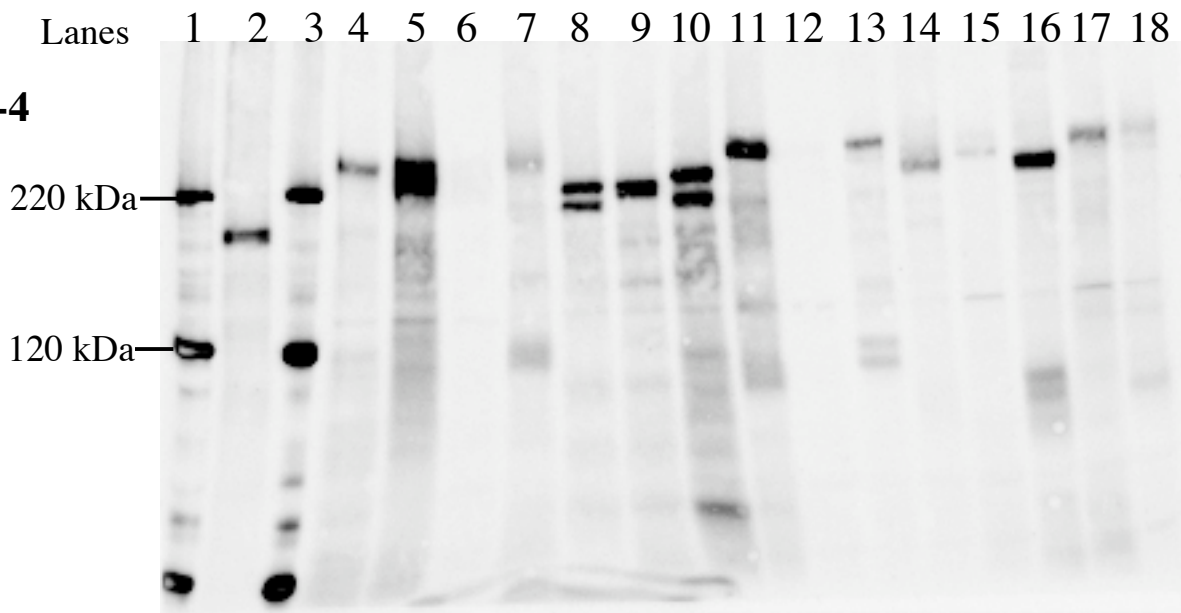

**050218-3**

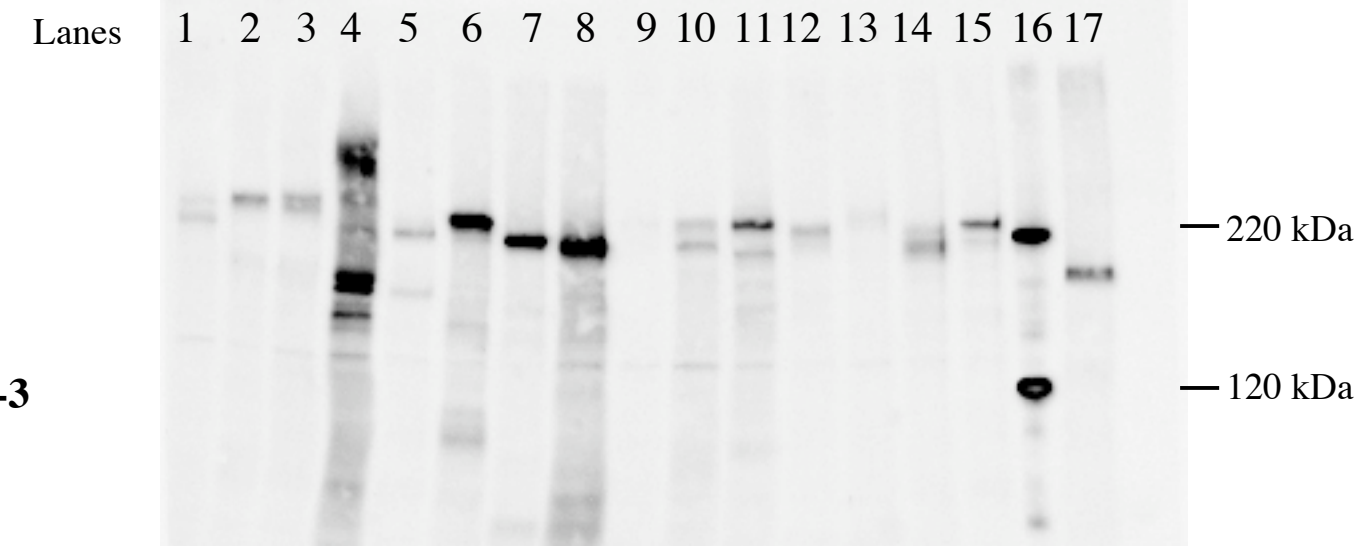

**050222A-1**

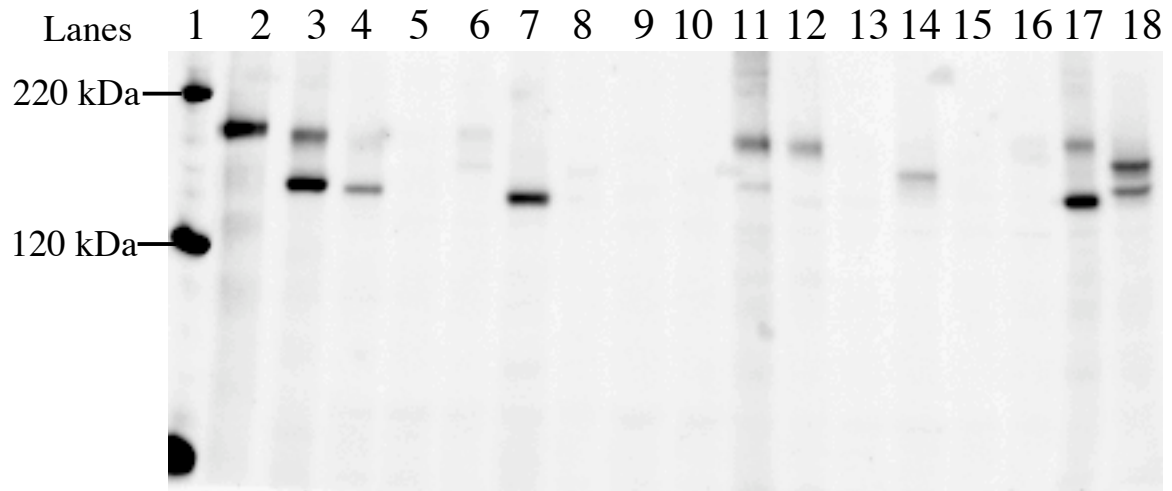

- 1 MW
- 2 Standard
- 3 YAL066W
- 4 YBL048W
- 5
- 6 YAR047C(2)
- 7 YBR027C
- 8 YBR051W(2)
- 9
- 10 YBR292C(2)
- 11 YBL062W
- 12 YBR266C
- 13
- 14 YBR113W
- 15
- 16 YBR224W
- 17 YCL022C
- 18 YCL001W(2)

Lanes 1 2 3 4 5 6 7 8 9 10 11 12 13 14 15 16 17

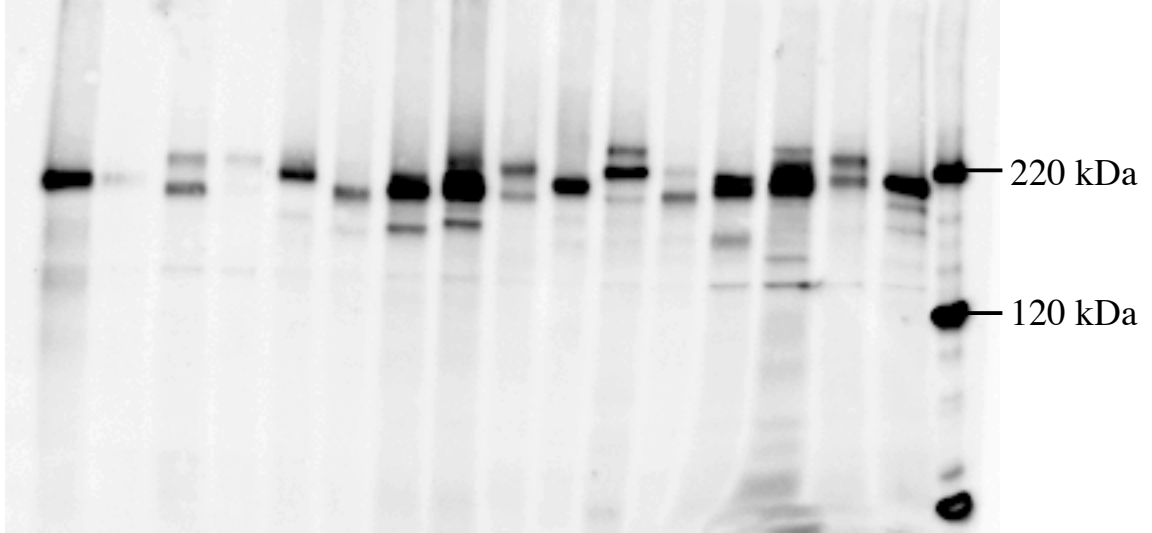

- 1 Standard
- 2 YBR004C
- 3 YBR243C(2)
- 4 YBL082C
- 5 YBR207W
- 6 YBR293W
- 7 YBR241C
- 8 YBR283C
- 9 YBL089W(2)
- 10 YCR028C
- 11 YAL022C
- 12 YCL038C
- 13 YBR220C(2)
- 14 YBL020W
- 15 YBR296C(2)
- 16 YCL025C
- 17 MW

**050222A-4**

**050222A-3**

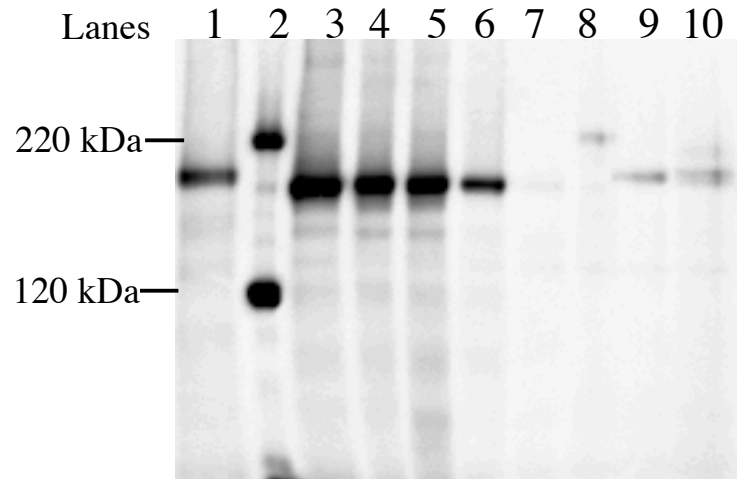

- 1 Standard
- 2 MW
- 3 YAL018C
- 4 YCR021C
- 5 YBR054W
- 6 YCR044C
- 7 YBR036C
- 8 YBR074W
- 9 YBR168W
- 10 YBR287W

**050222B-1**

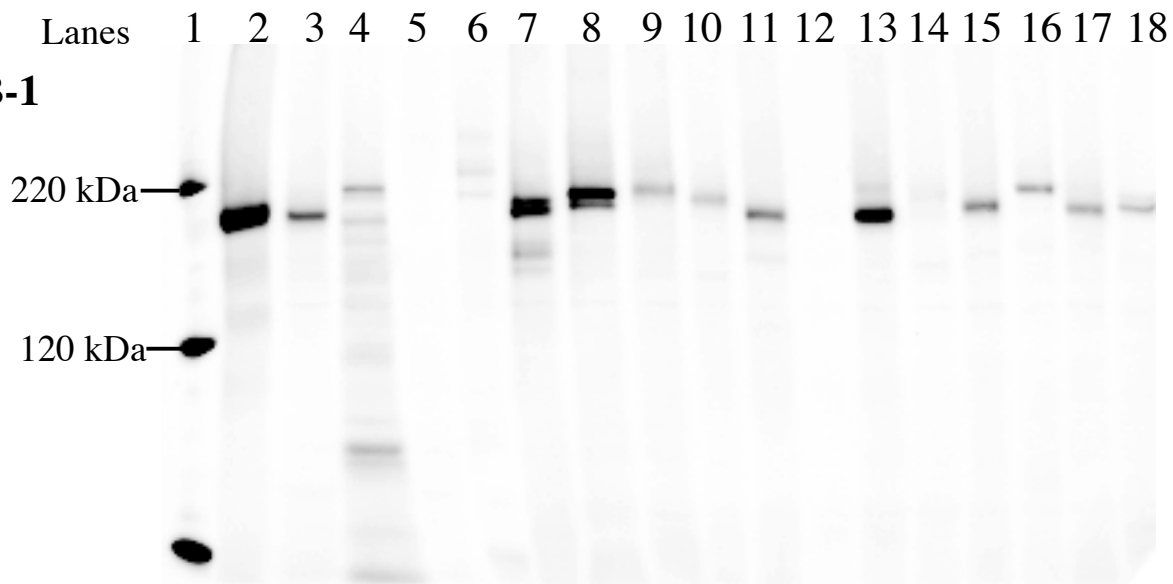

- 1 MW
- 2 Standard
- 3 YOL119C
- 4 YDR470C(2)
- 5
- 6 YGL065C(3)
- 7 YMR221C(2)
- 8 YGL055W
- 9 YJR015W
- 10 YHR048W
- 11 YOR378W
- 12
- 13 YMR013C
- 14 YOR306C(2)
- 15 YLR004C
- 16 YDR072C
- 17 YER060W
- 18 YHR007C

**050222B-2**

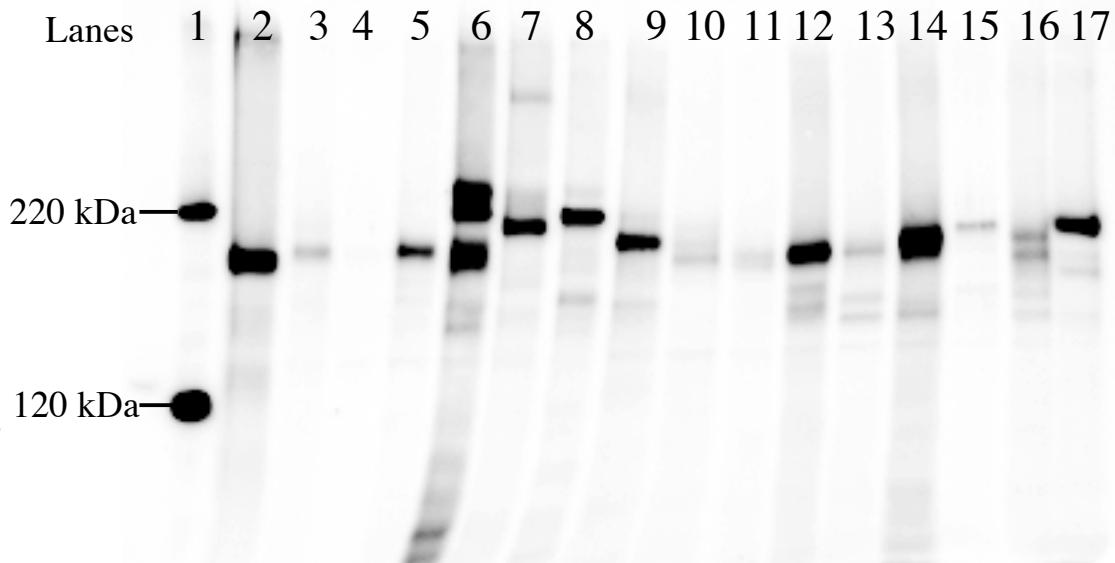

- 1 MW
- 2 Standard
- 3 YER060W-A
- 4 YKL039W(2)
- 5 YLL055W
- 6 YHL017W(3)
- 7 YNL294C
- 8 YDR434W
- 9 YGR260W
- 10 YOR161C
- 11 YNL318C
- 12 YFL040W
- 13 YMR279C
- 14 YMR011W
- 15 YIL166C
- 16 YML116W(2)
- 17 YBR132C

**050222B-3**

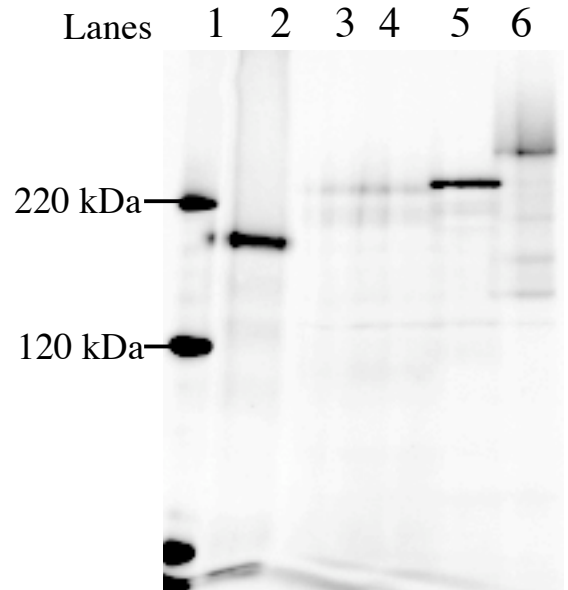

- 1 MW
- 2 Standard
- 3
- 4
- 5 YLR092W
- 6 YGR089W

**050222B-4**

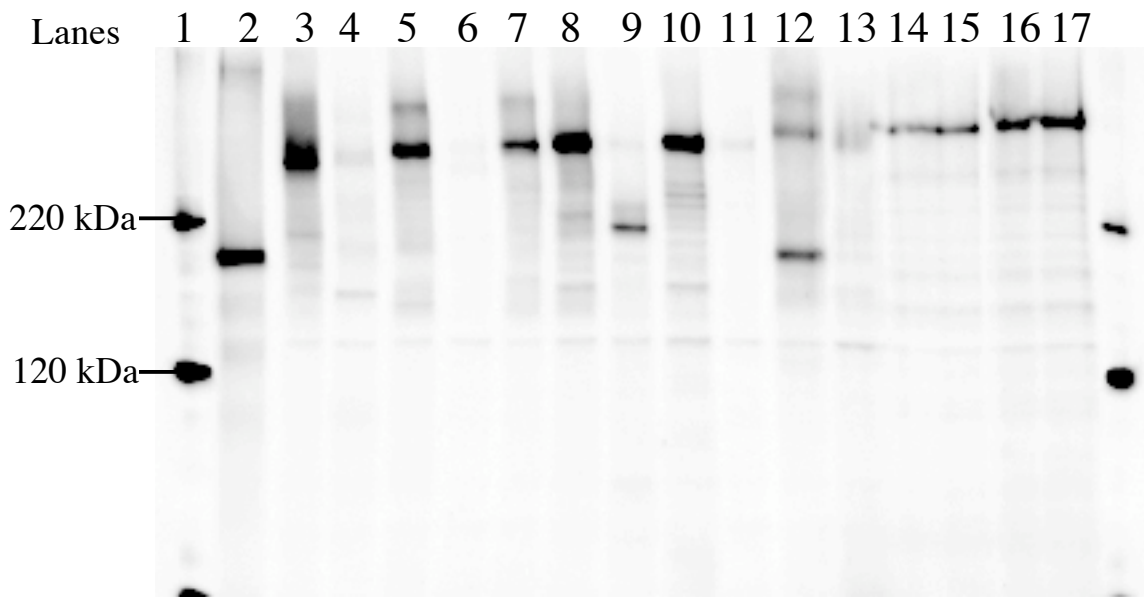

- 1 MW
- 2 Standard
- 3 YLL015W
- 4 YOR328W
- 5 YER166W
- 6 YHL035C(2)
- 7 YDR093W
- 8 YMR162C
- 9
- 10 YML059C
- 11 YMR306W
- 12 YLR342W(#)
- 13 YGR217W(#)
- 14
- 15
- 16
- 17 YPR117W

**050224-3**

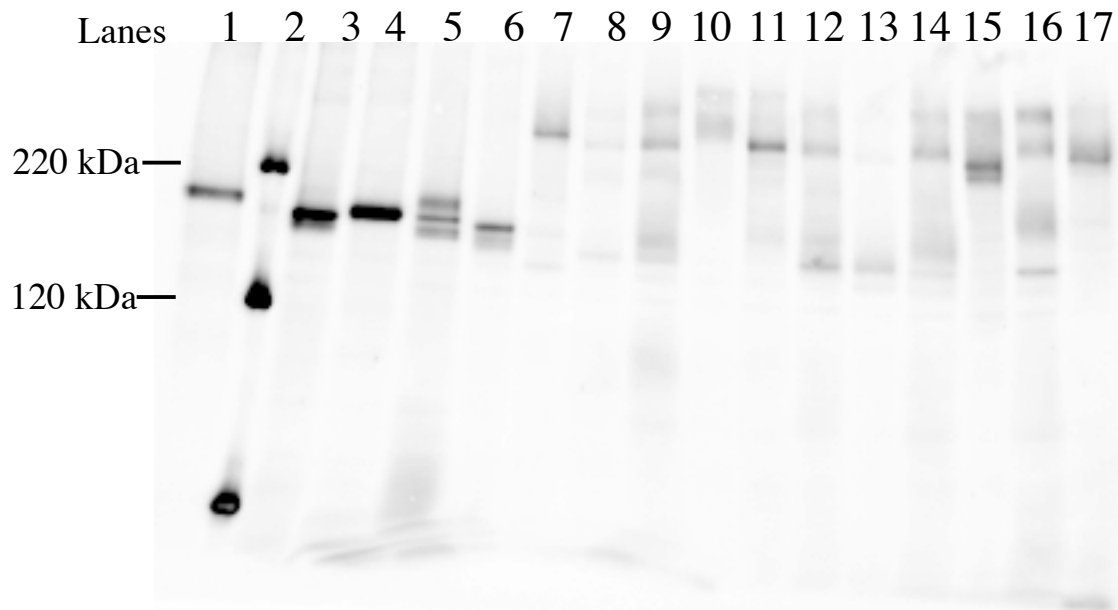

- 1 Standard
- 2 MW
- 3 YCR010C
- 4 YAR031W
- 5 YBR040W(3)
- 6 YBR183W
- 7 YIL030C
- 8 YOR011W(3)
- 9 YIL013C(3)
- 10 YOR291W
- 11 YGR281W
- 12 YDR011W
- 13 YPL058C
- 14 YOR153W
- 15 YDR135C(2)
- 16 YDR406W
- 17 YLL015W

**050224-2**

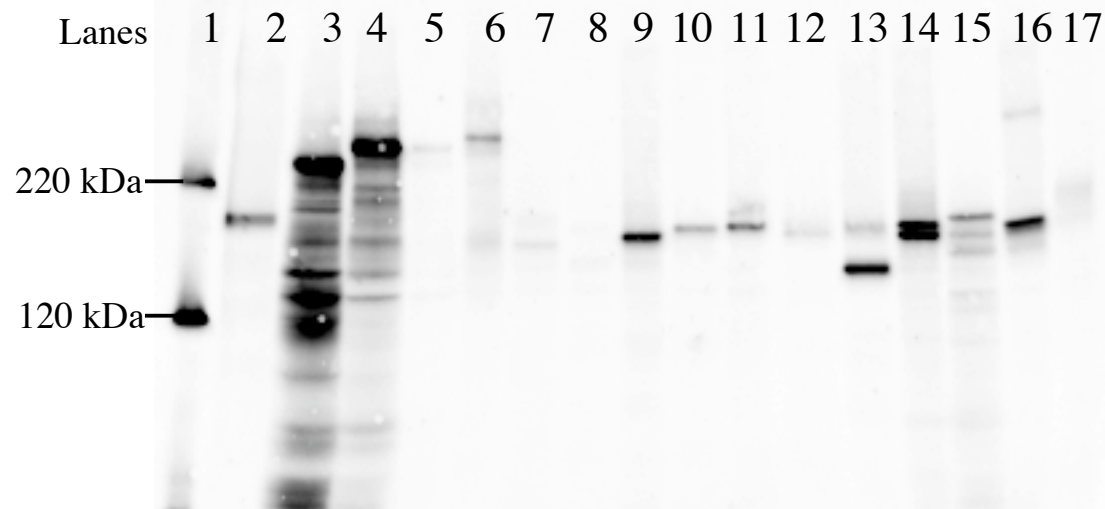

- 1 MW
- 2 Standard
- 3 YBR235W
- 4 YBR023C
- 5 YBR295W
- 6 YAL026C
- 7 YAL008W
- 8 YBR201W(2)
- 9 YBL102W
- 10 YAR002C-A
- 11 YAR033W
- 12 YAR028W
- 13 YAR027W
- 14 YCR007C(2)
- 15 YCL005W
- 16 YAL009W
- 17 YBR187W

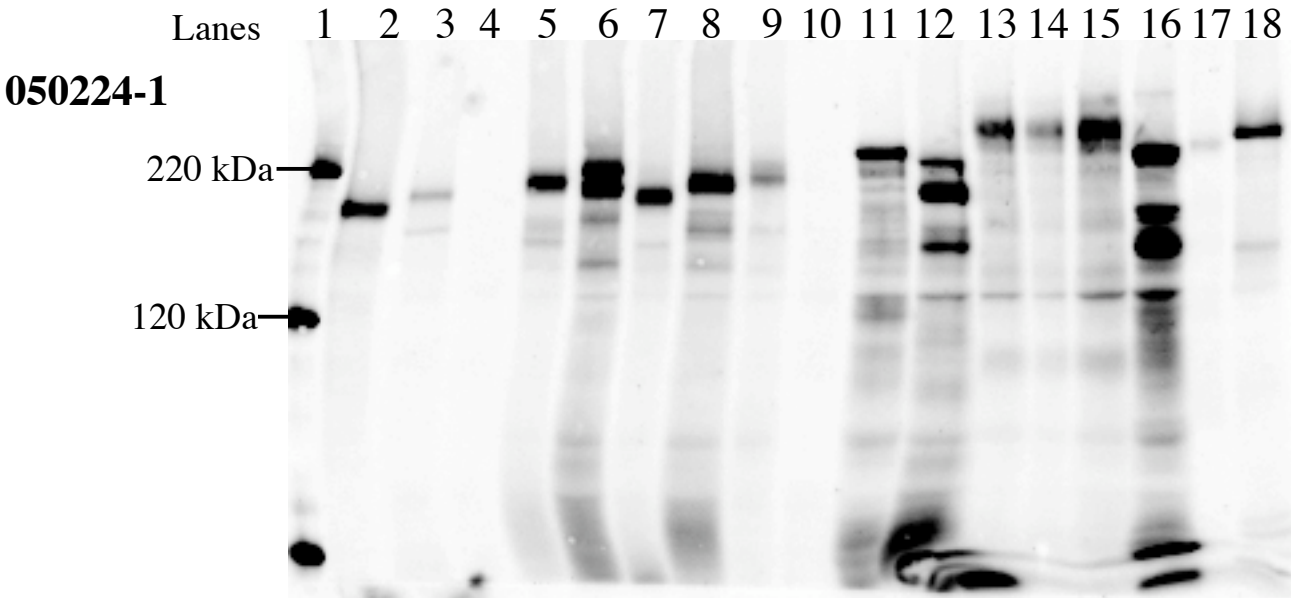

- 1 MW
- 2 Standard
- 3 YBR068C
- 4 YCR048W
- 5 YCR023C
- 6 YBR298C(2)
- 7 YCL073C
- 8 YBR021W
- 9 YBR043C
- 10 YBL011W
- 11 YCL045C
- 12 YAL053W
- 13 YCR037C
- 14 YBR086C
- 15 YCR017C
- 16 YCR011C

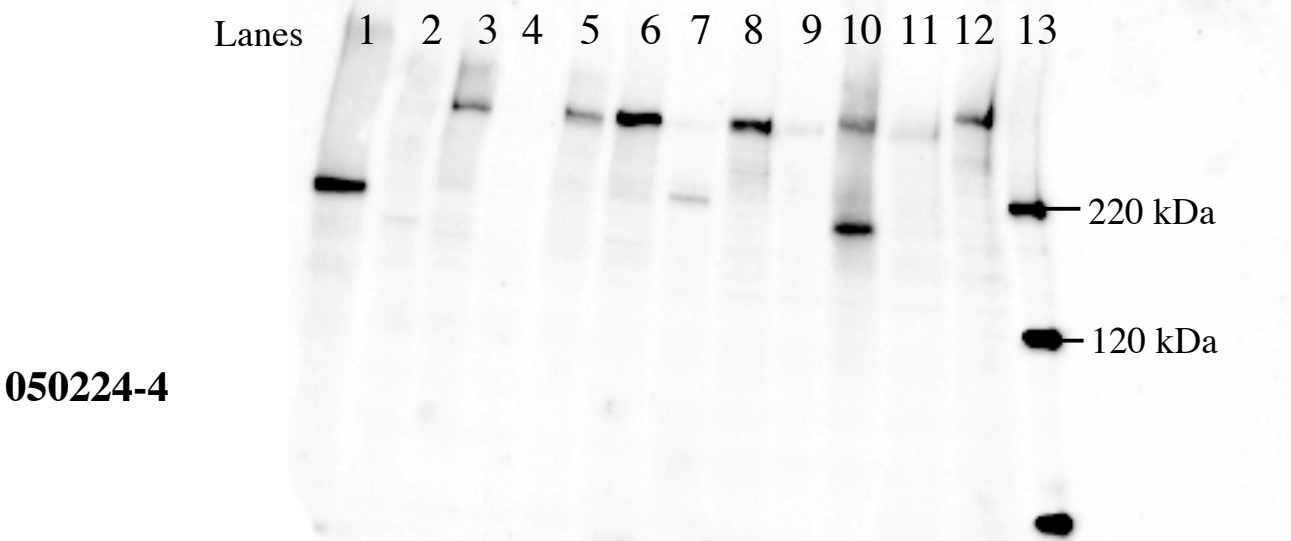

- 1 Standard
- 2
- 3 YER166W
- 4
- 5 YDR093W
- 6 YMR162C
- 7 YLL048C
- 8 YML059C
- 9 YMR306W
- 10 YLR342W
- 11 YGR217W
- 12 YPR117W
- 13 MW
